# Supplementary material
Source: PubMed Central journal article supplement (PMC10807405)

## **Structural insights into cytokine cleavage by inflammatory caspase-4**

Pascal Devant<sup>1\*</sup>, Ying Dong<sup>2,3\*</sup>, Julian Mintseris<sup>4</sup>, Weiyi Ma<sup>1</sup>, Steven P. Gygi<sup>4</sup>, Hao Wu<sup>2,3,5</sup>,  
Jonathan C. Kagan<sup>1,5</sup>

<sup>1</sup>Division of Gastroenterology, Boston Children's Hospital and Harvard Medical School, Boston, MA, USA; <sup>2</sup>Department of Biological Chemistry and Molecular Pharmacology, Harvard Medical School, Boston, MA, USA. <sup>3</sup>Program in Cellular and Molecular Medicine, Boston Children's Hospital, Boston, MA, USA. <sup>4</sup>Department of Cell Biology, Harvard Medical School, Boston, MA, USA.

<sup>5</sup>For correspondence: [jonathan.kagan@childrens.harvard.edu](mailto:jonathan.kagan@childrens.harvard.edu), [wu@crystal.harvard.edu](mailto:wu@crystal.harvard.edu)

\*These authors contributed equally to this work.

**Supplementary Figure 1: Uncropped gels and blots.**

**Supplementary Video 1: 3D variability analysis of caspase-4/pro-IL-18 complex.**

**Supplementary Video legends**

**Supplementary Video 1: 3D variability analysis of caspase-4/pro-IL-18 complex.** Domain flexibility within caspase-4/pro-IL-18 complex indicated by 3D variability analysis.

Figure 1g

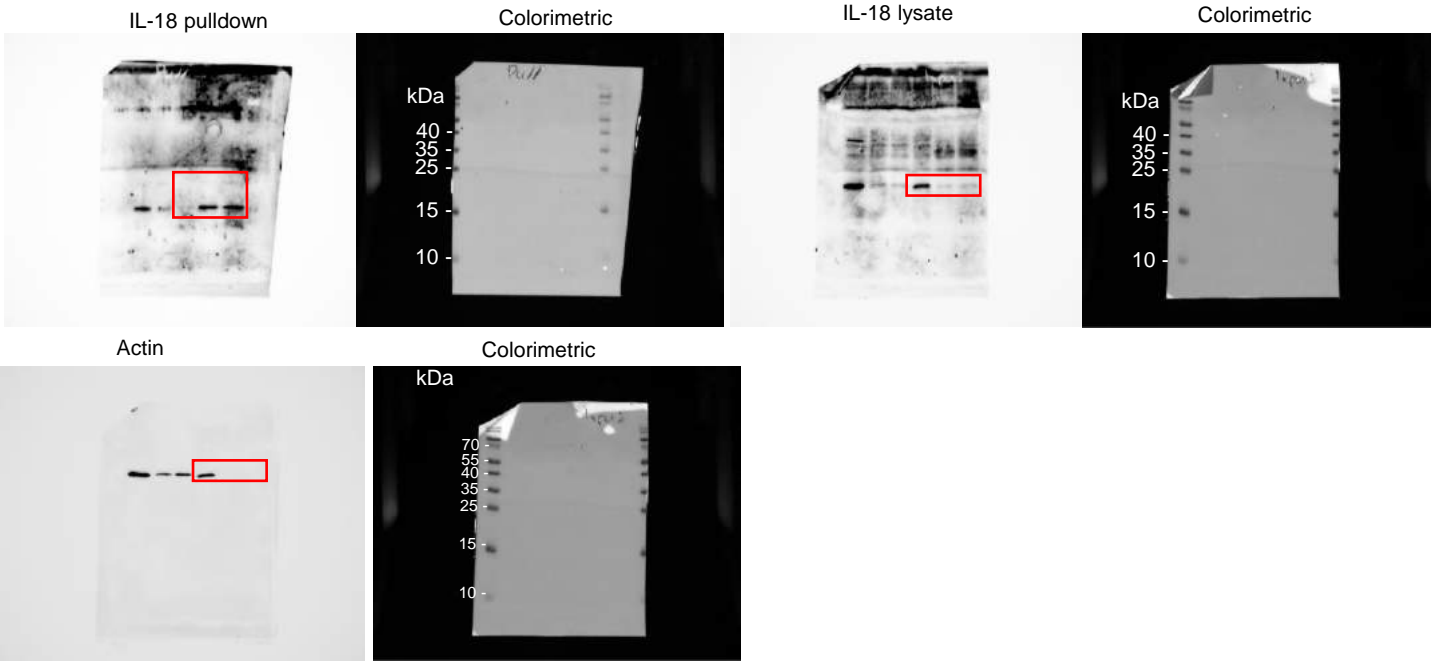

Figure 1h

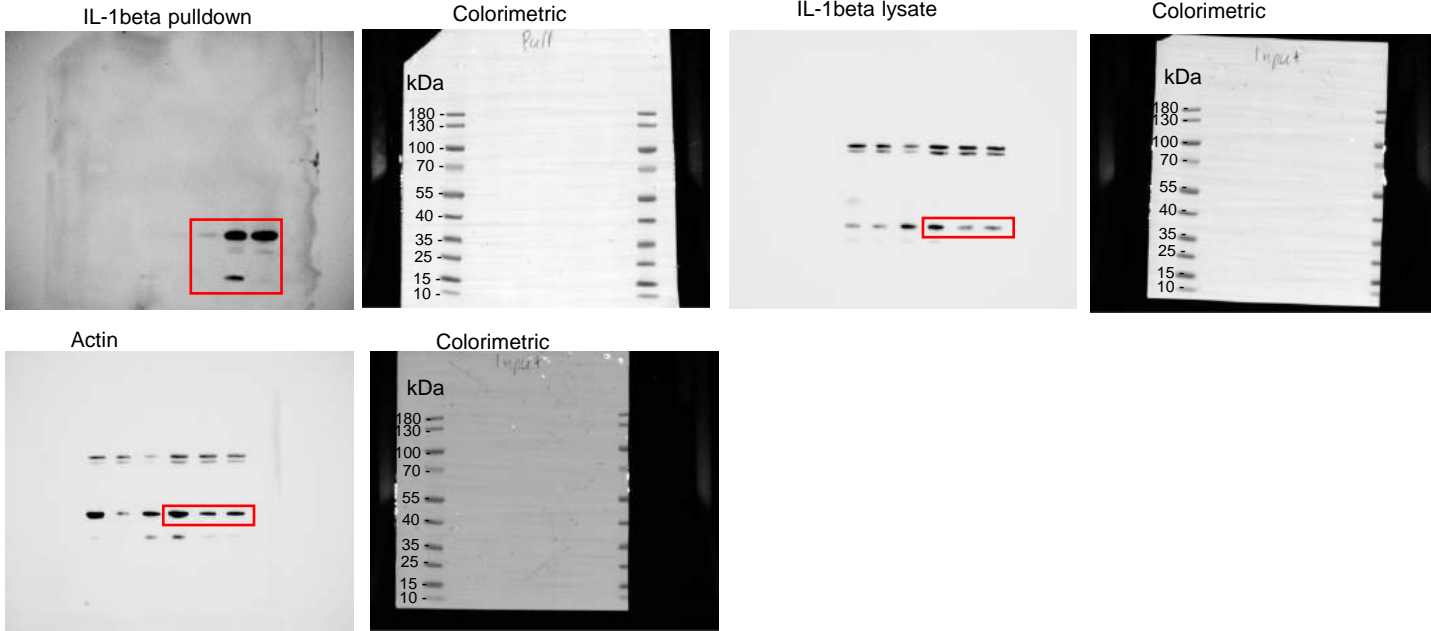

Figure 4d

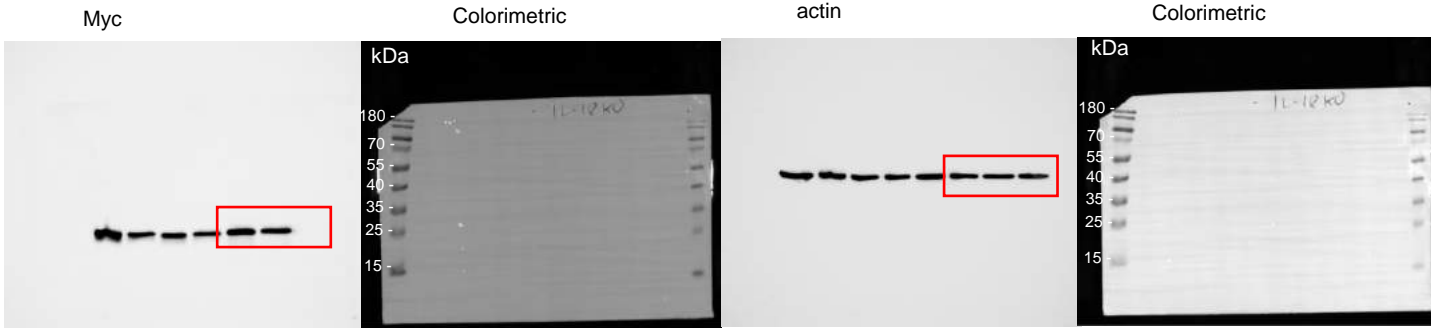

**Figure 5i**

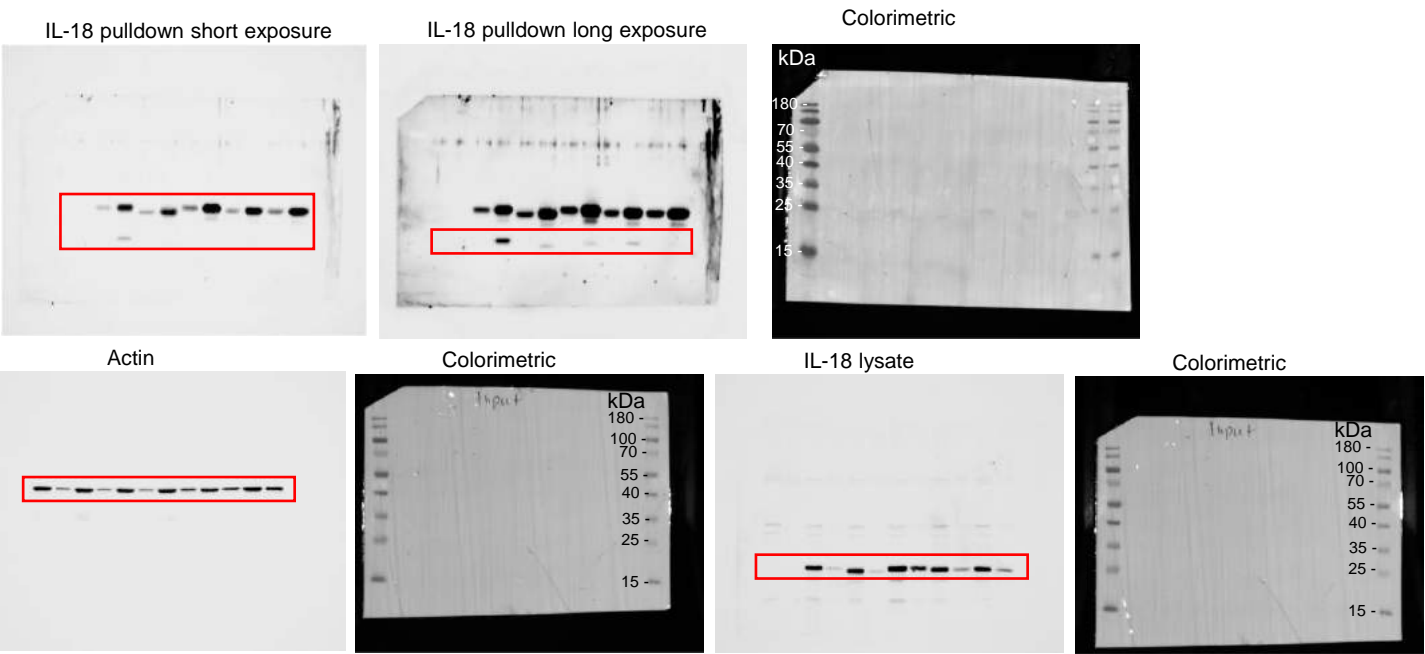

**Figure 6d**

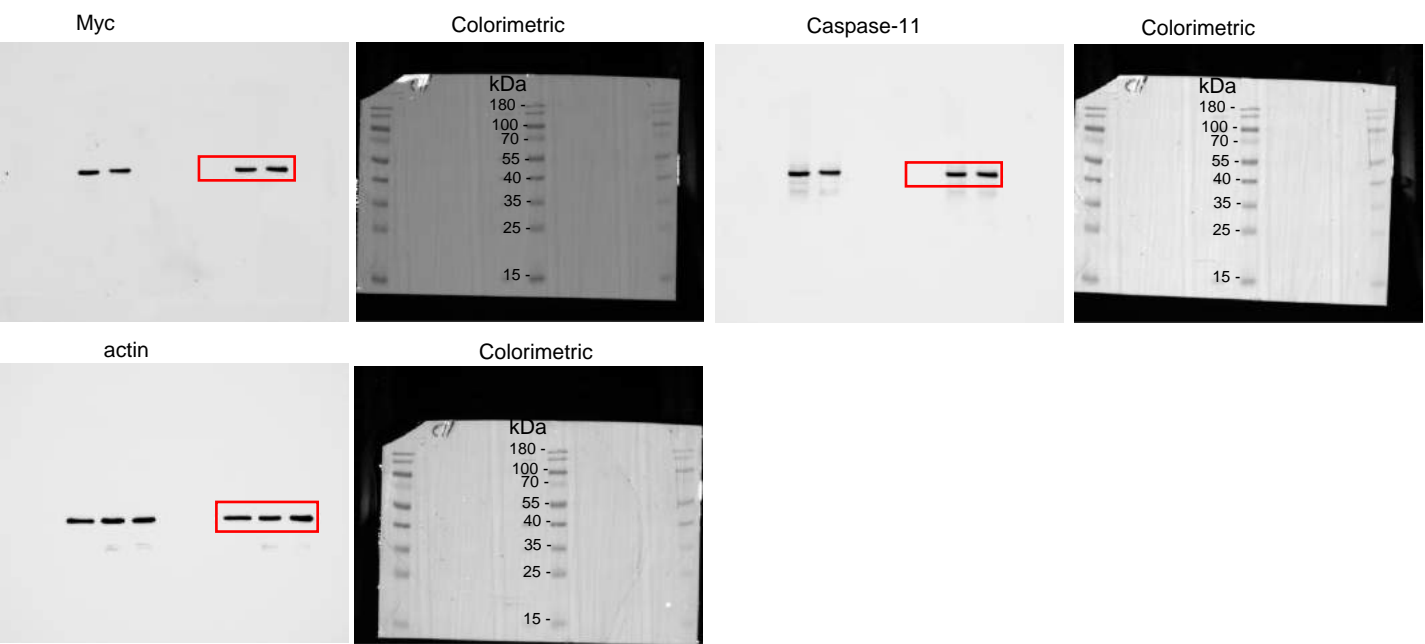

**Figure 6e**

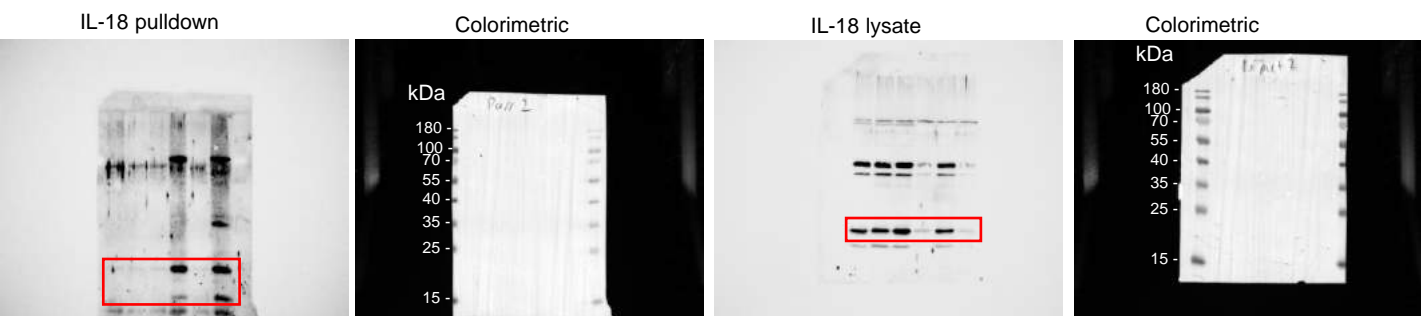

**Extended Data Figure 1a**

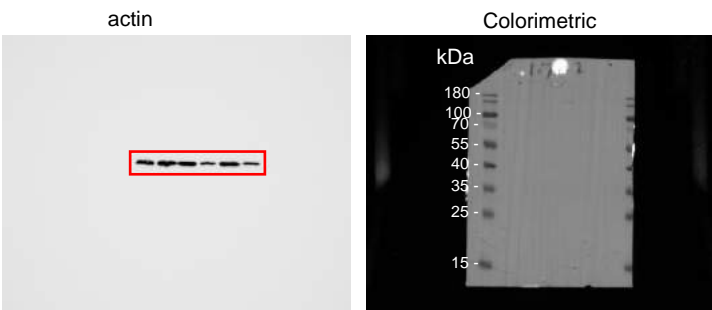

**Extended Data Figure 1b**

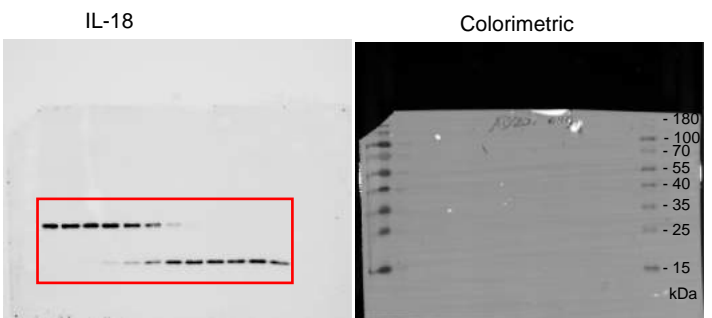

**Extended Data Figure 1d**

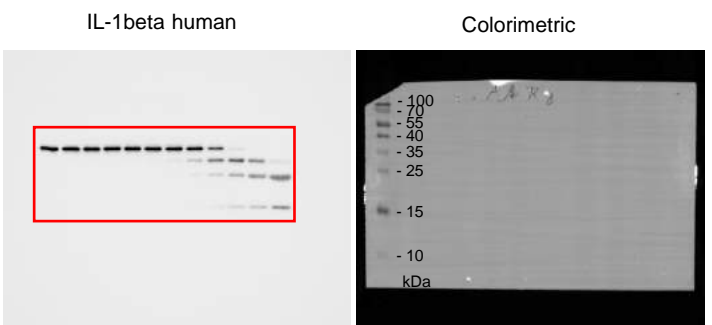

**Extended Data Figure 1f**

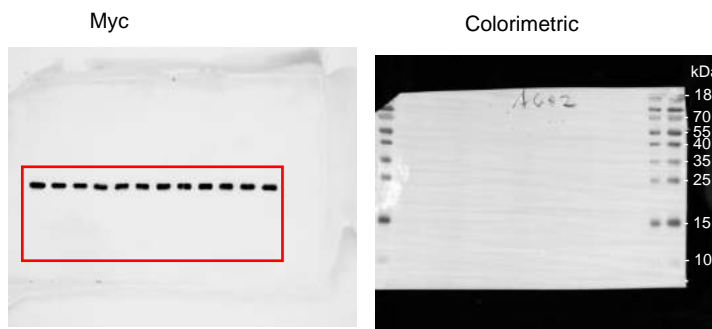

**Extended Data Figure 1c**

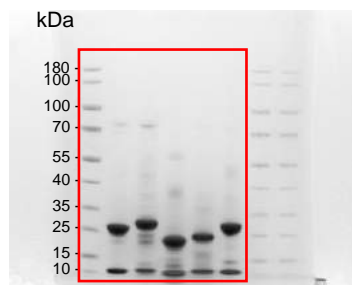

**Extended Data Figure 1e**

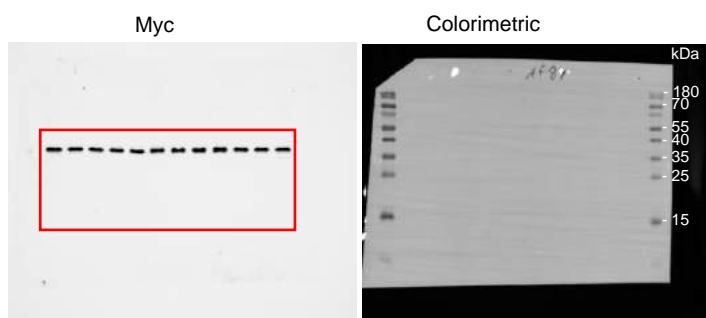

**Extended Data Figure 1g**

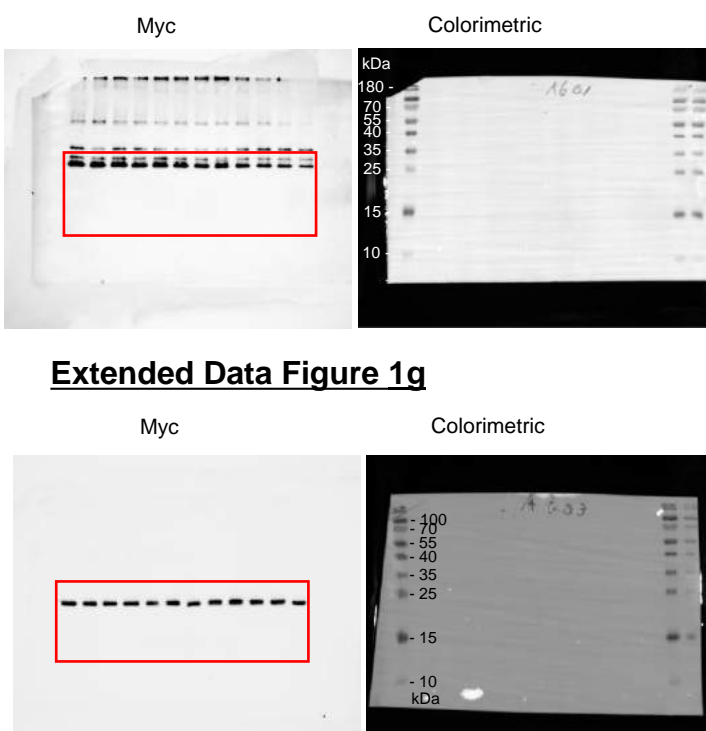

**Extended Data Figure 1h**

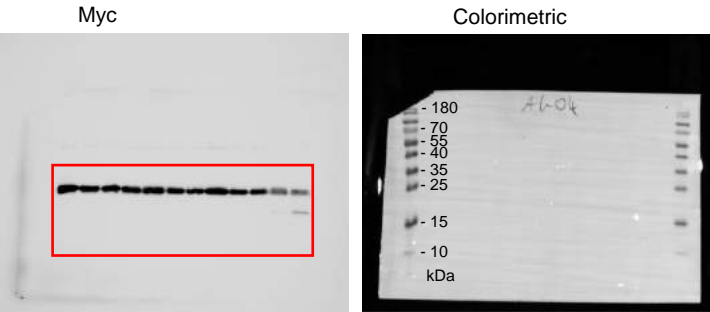

**Extended Data Figure 1i**

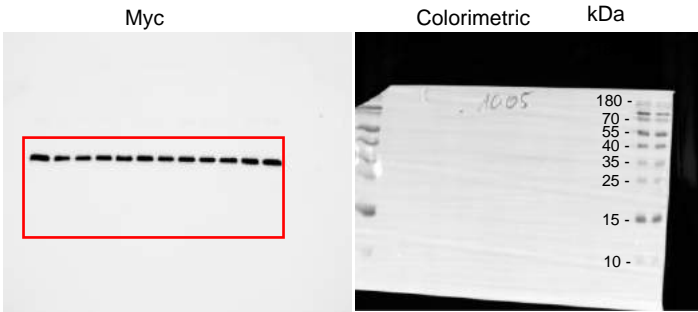

**Extended Data Figure 1j**

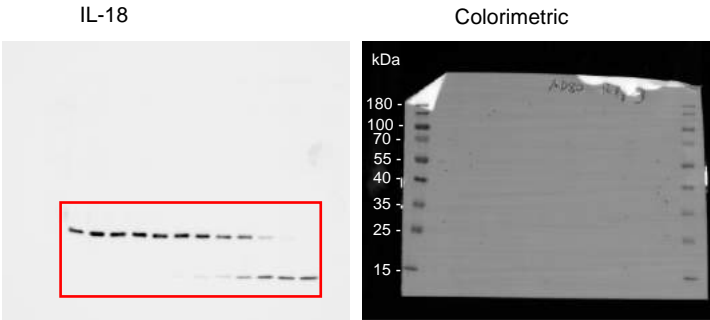

**Extended Data Figure 1k**

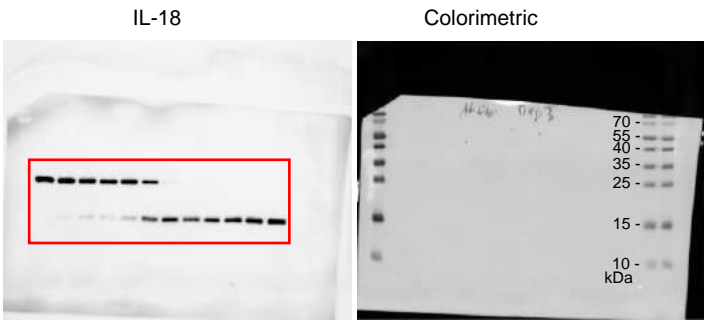

**Extended Data Figure 1l**

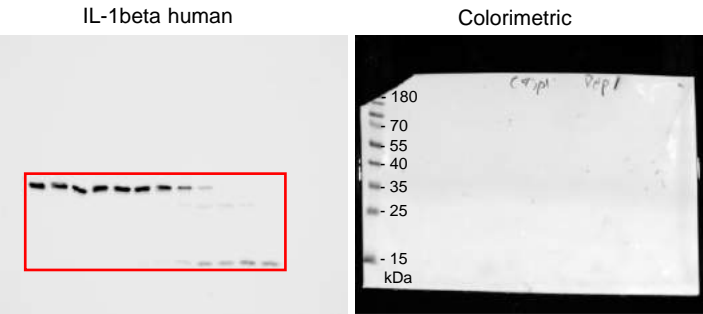

**Extended Data Figure 1m**

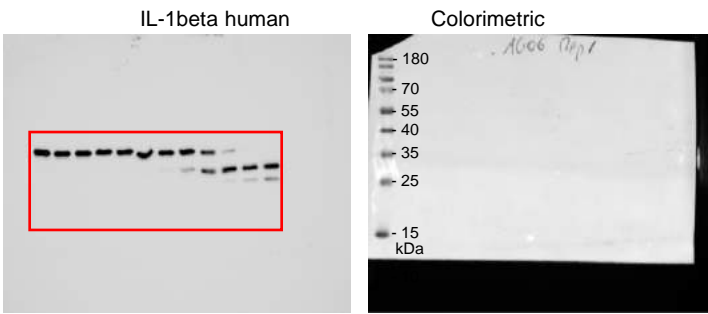

**Extended Data Figure 1n**

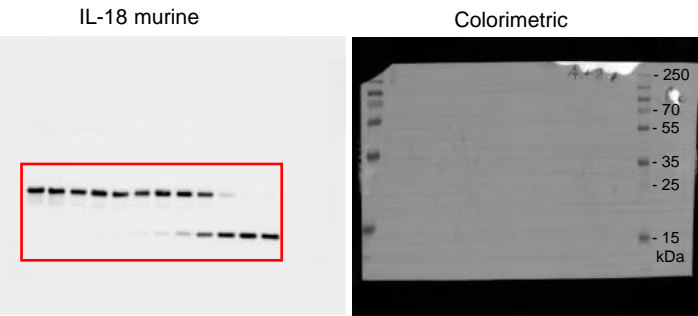

**Extended Data Figure 1o**

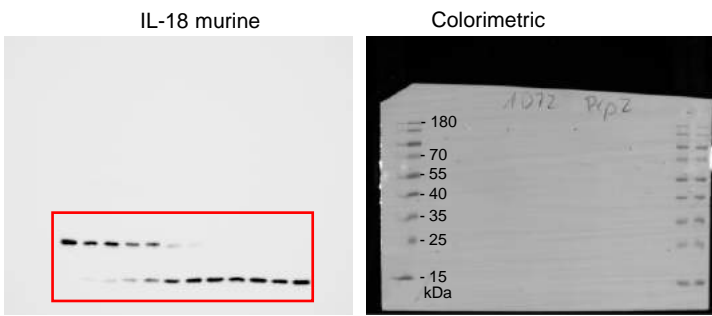

**Extended Data Figure 1p**

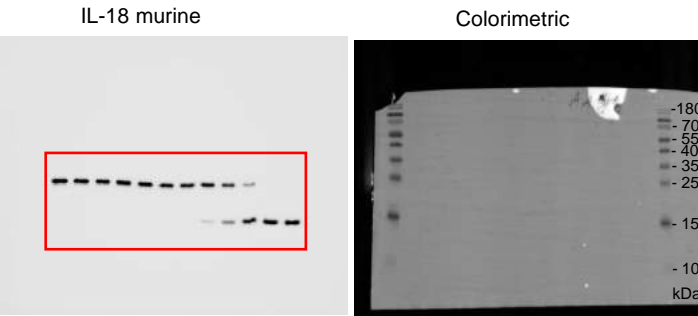

**Extended Data Figure 1q**

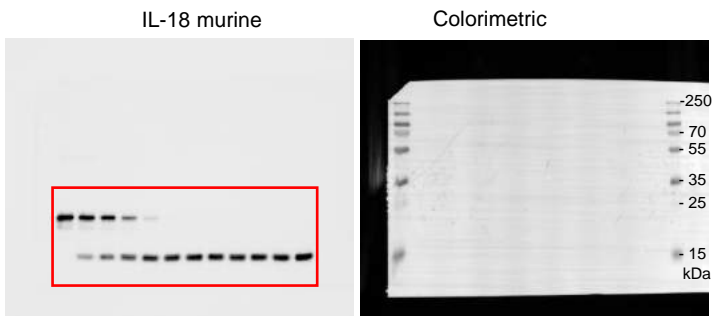

**Extended Data Figure 1r**

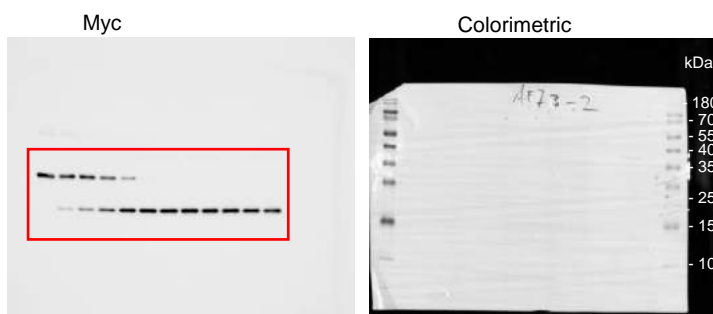

**Extended Data Figure 1s**

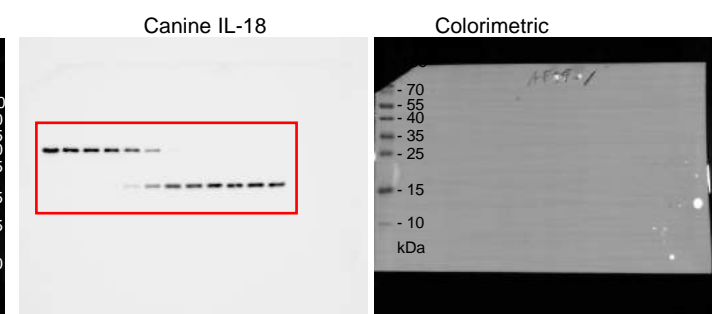

**Extended Data Figure 1t**

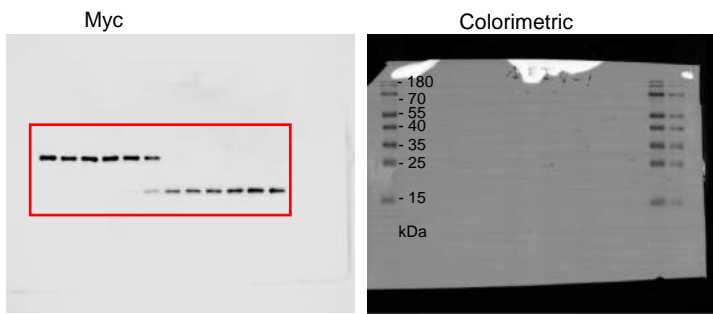

**Extended Data Figure 1u**

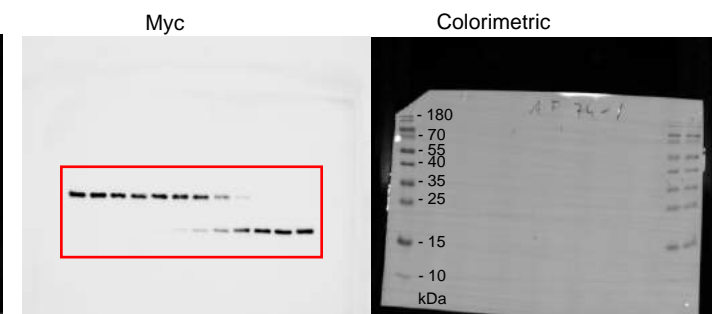

**Extended Data Figure 1v**

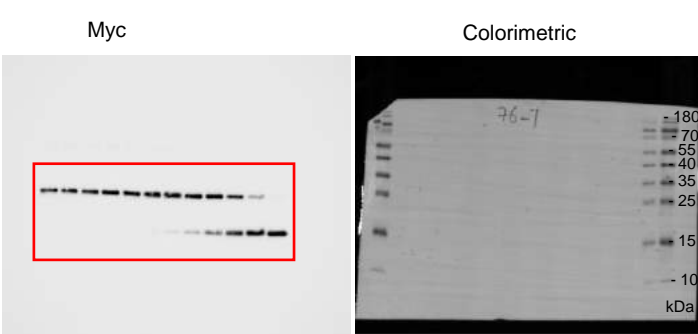

**Extended Data Figure 1w**

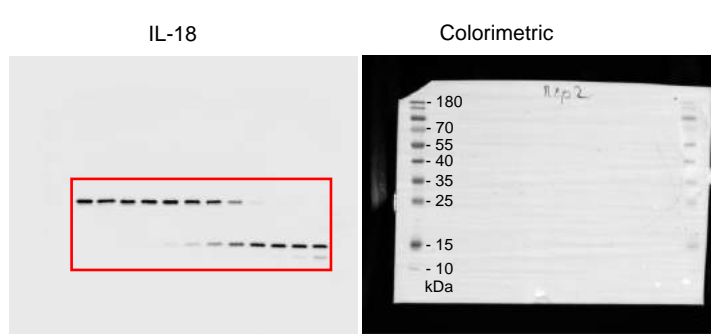

**Extended Data Figure 2c**

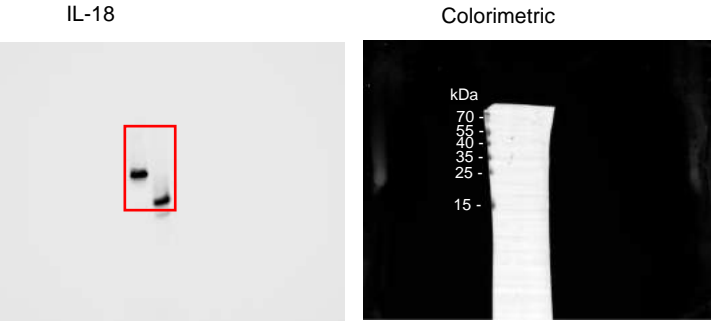

**Extended Data Figure 2d**

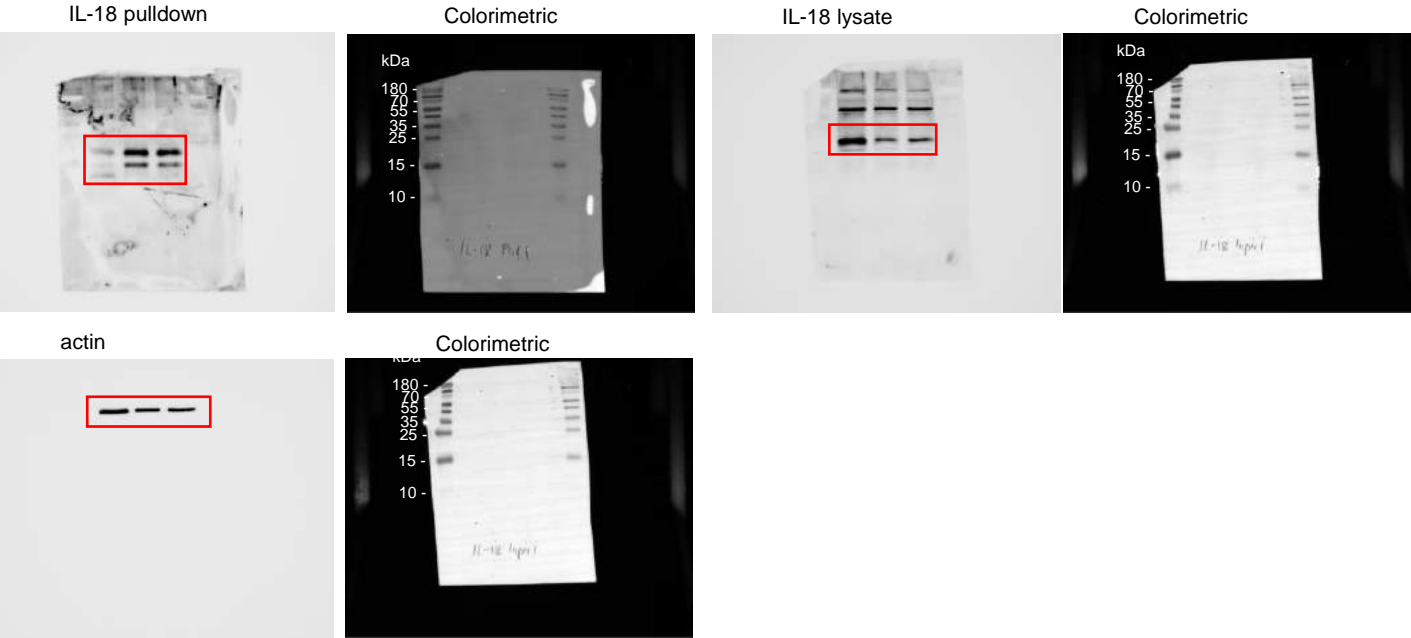

**Extended Data Figure 2e**

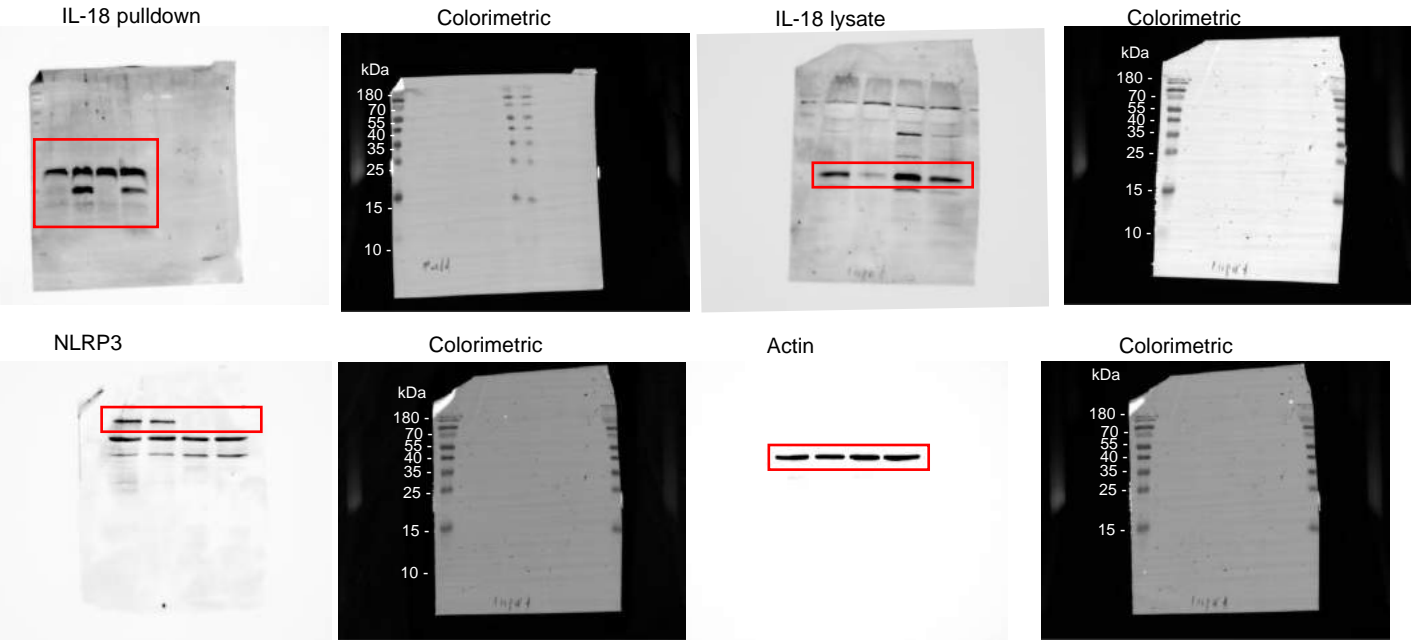

**Extended Data Figure 2f**

IL-1beta human pulldown

Colorimetric

IL-1beta human lysate

Colorimetric

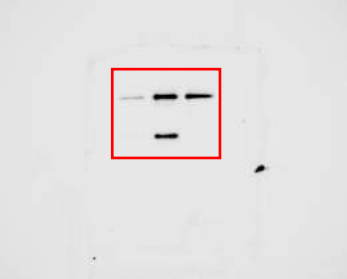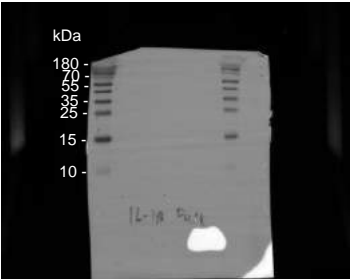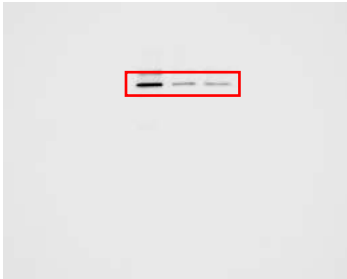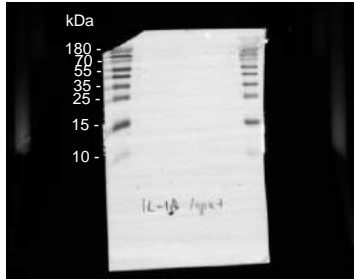

actin

Colorimetric

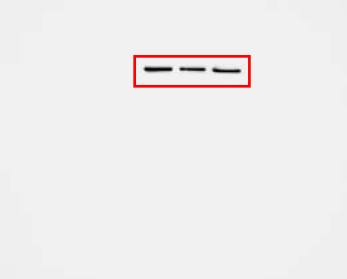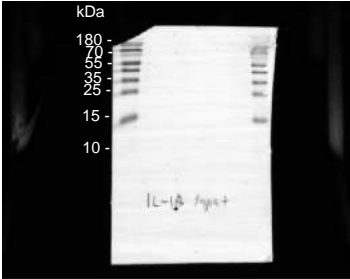

**Extended Data Figure 2g**

IL-1beta human pulldown

Colorimetric

IL-1beta human lysate

Colorimetric

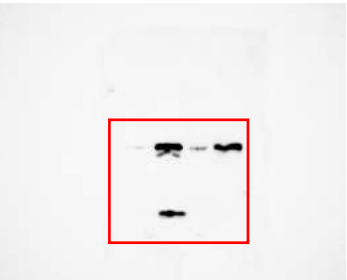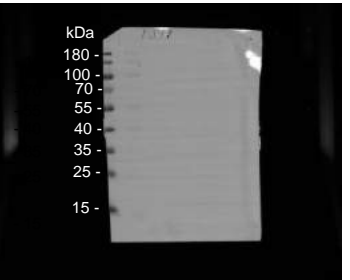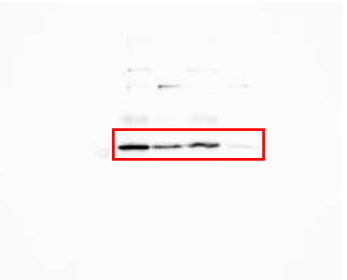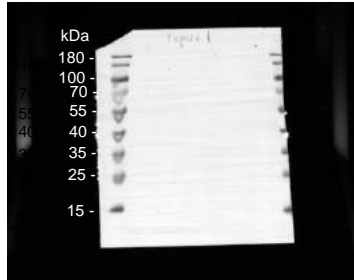

NLRP3

Colorimetric

Actin

Colorimetric

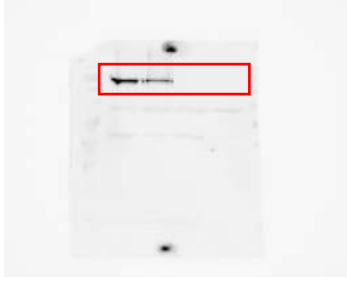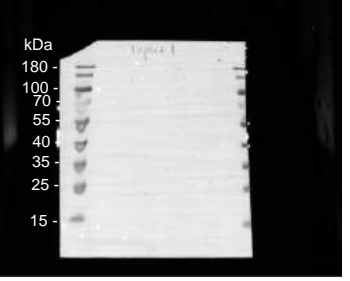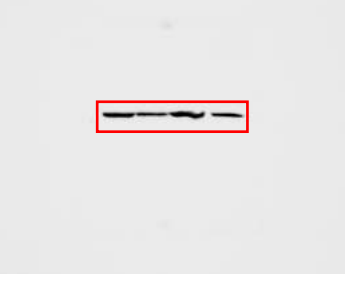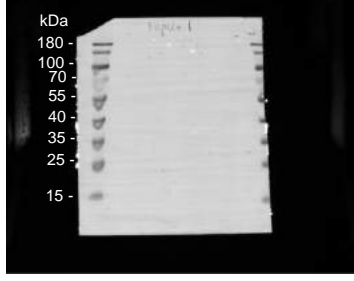

**Extended Data Figure 2h**

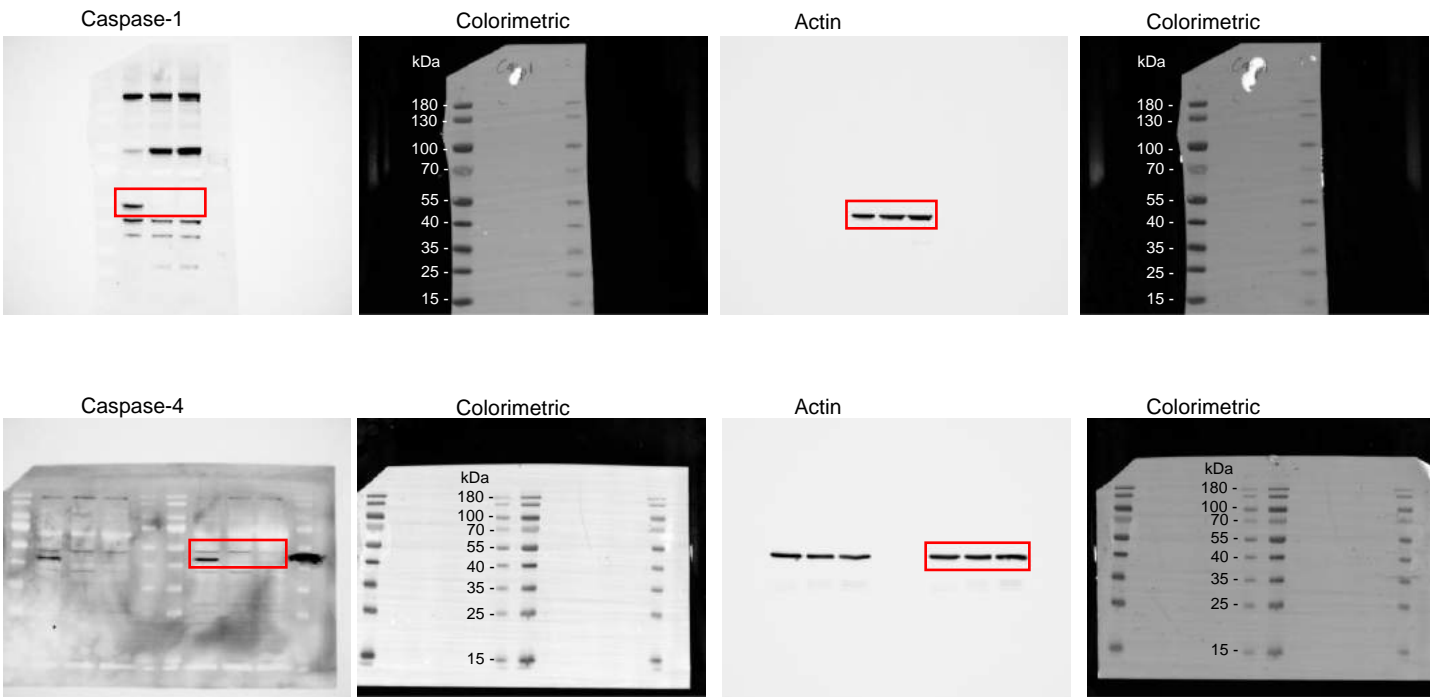

**Extended Data Figure 2j**

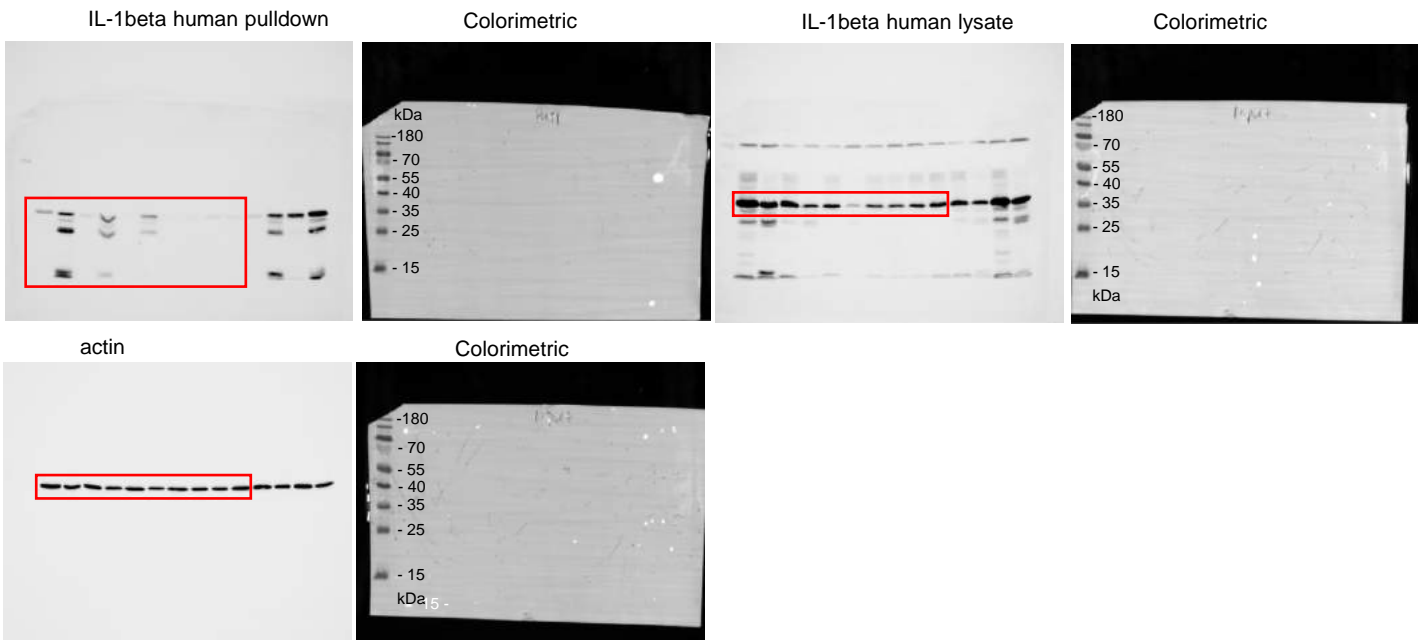

**Extended Data Figure 2k**

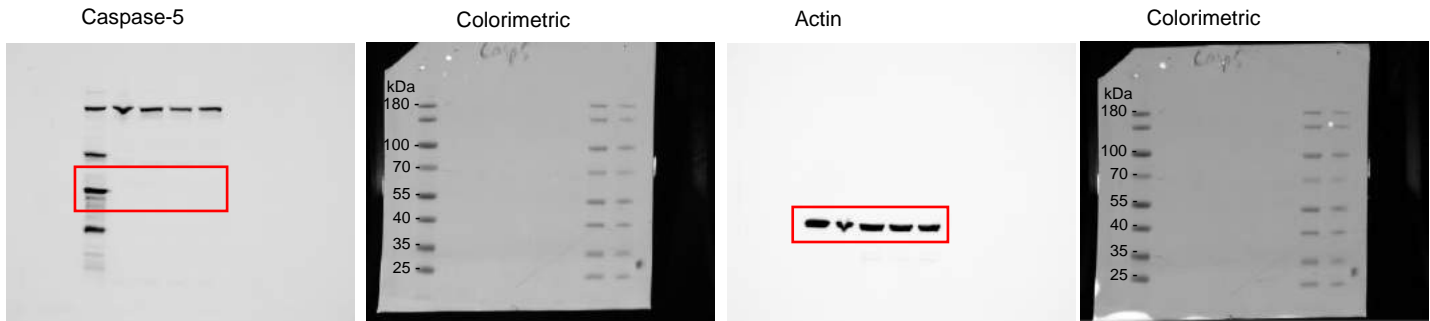

**Extended Data Figure 2l**

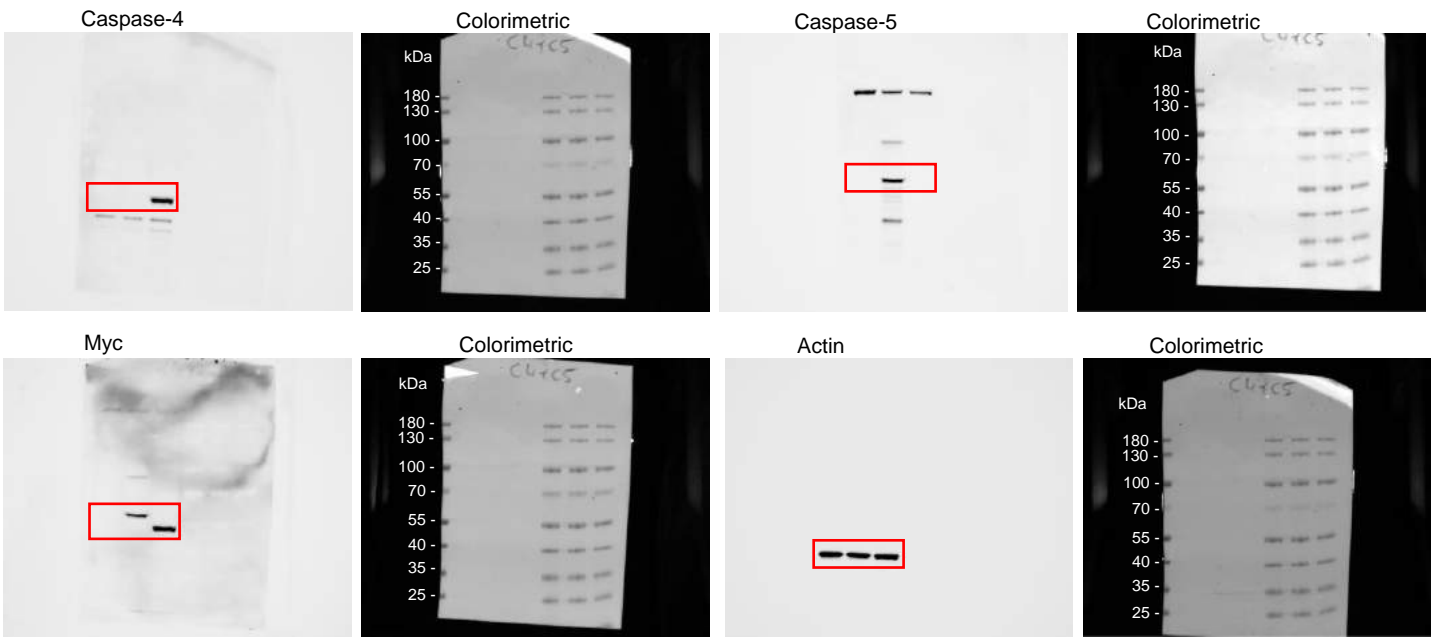

**Extended Data Figure 3d**

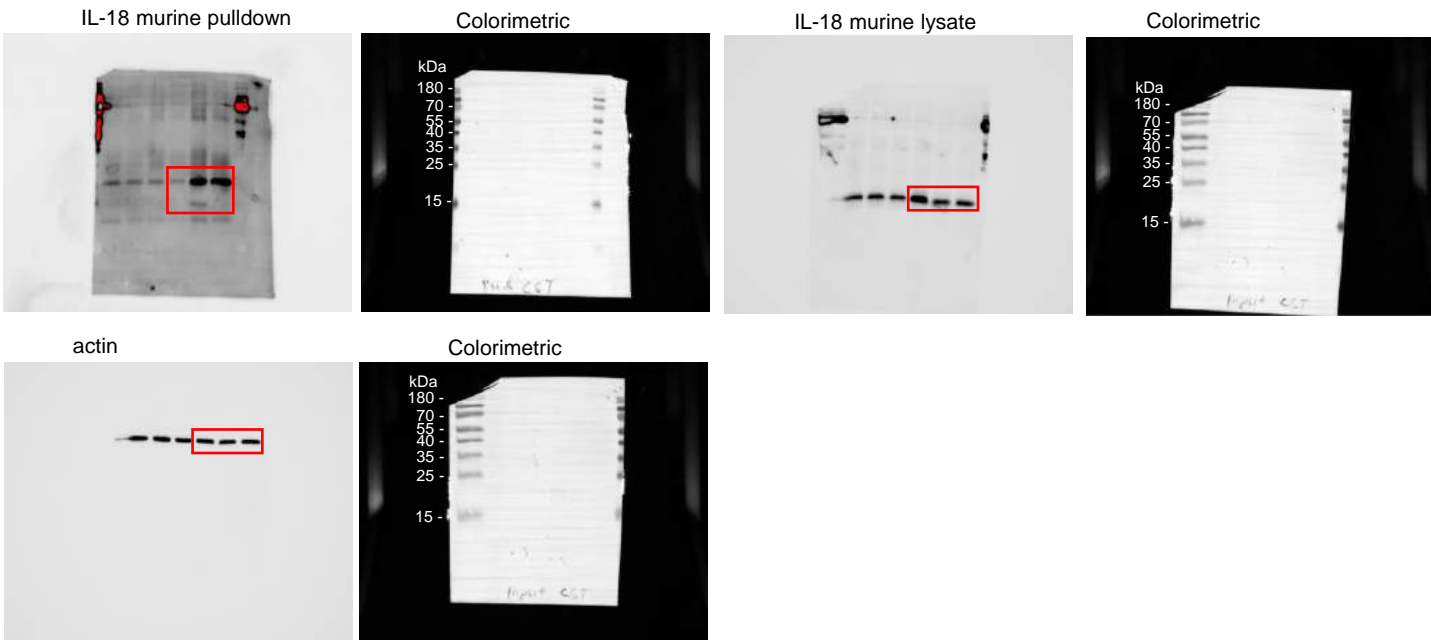

**Extended Data Figure 3e**

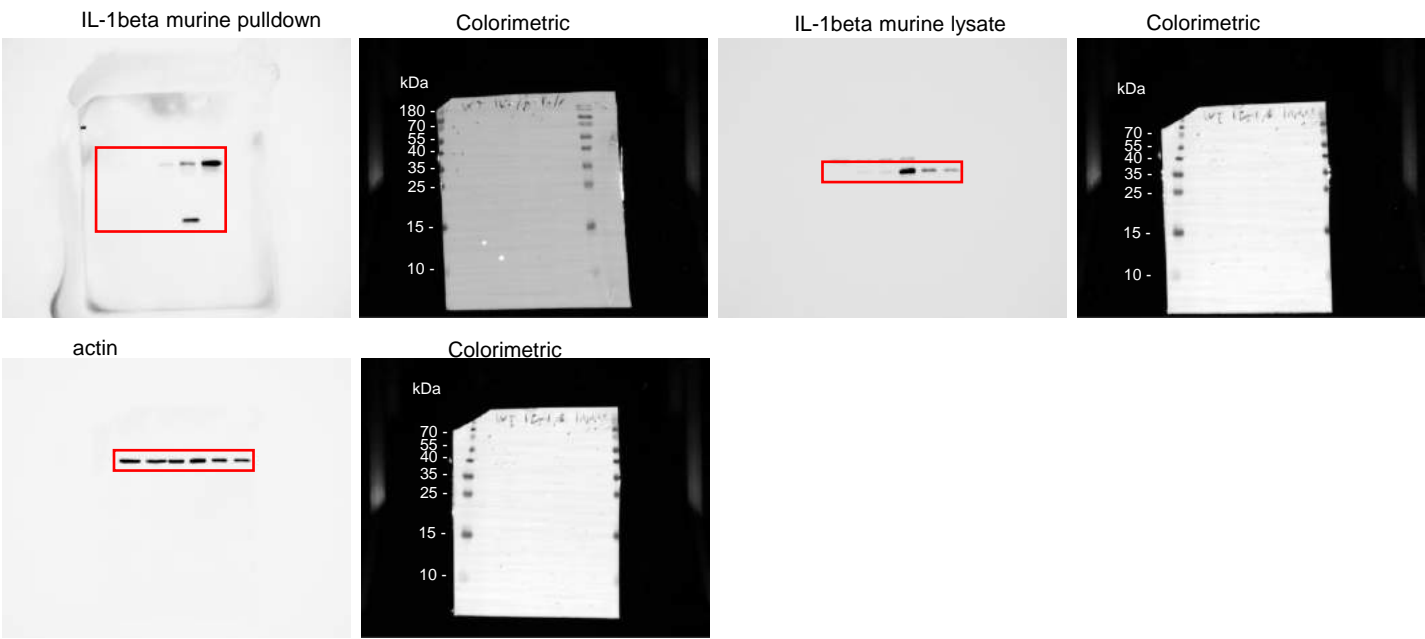

**Extended Data Figure 3f**

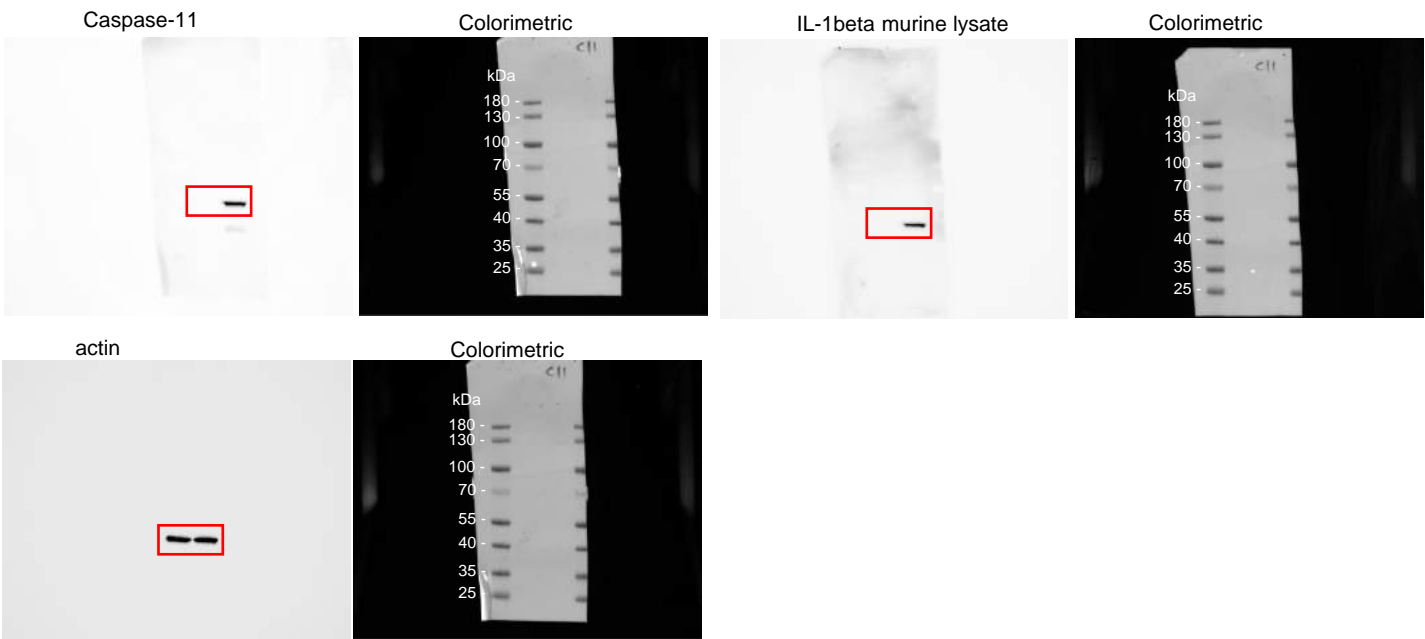

**Extended Data Figure 4a**

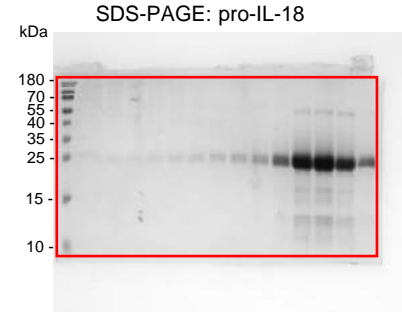

**Extended Data Figure 4b**

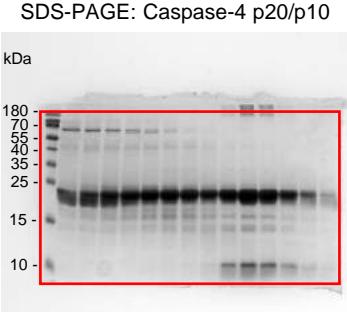

**Extended Data Figure 4c**

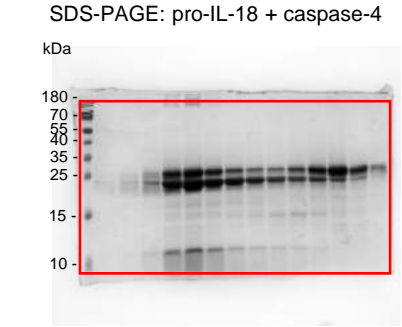

**Extended Data Figure 4d**

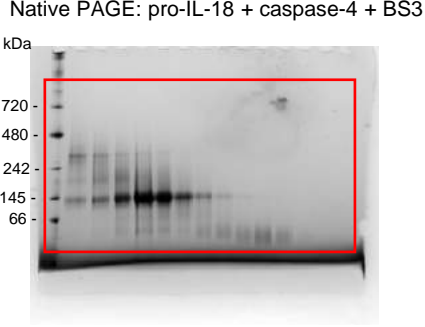

**Extended Data Figure 7a**

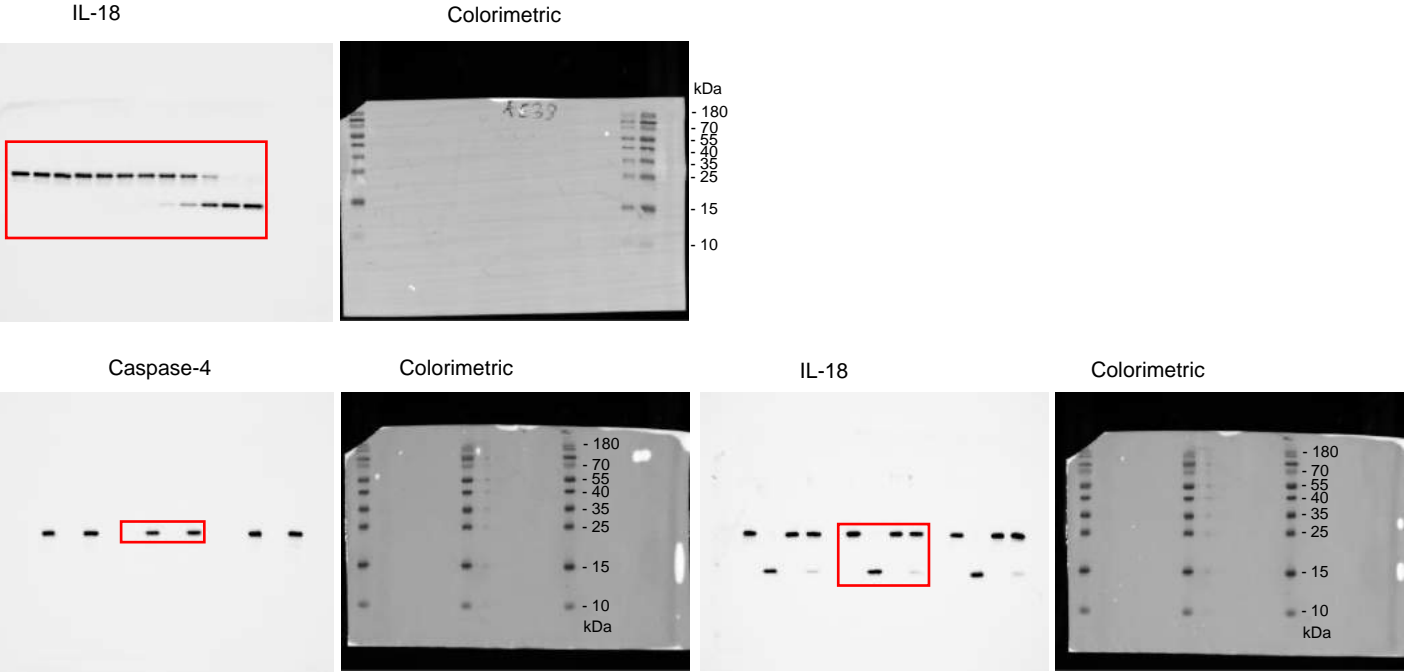

**Extended Data Figure 7c**

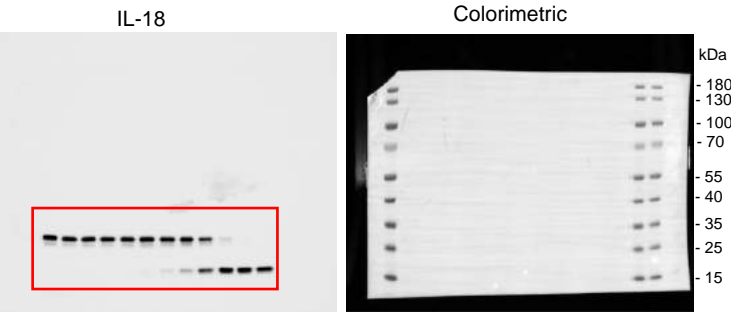

**Extended Data Figure 7d**

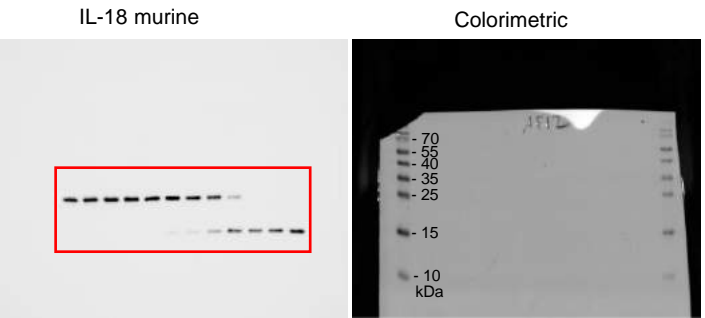

**Extended Data Figure 7f**

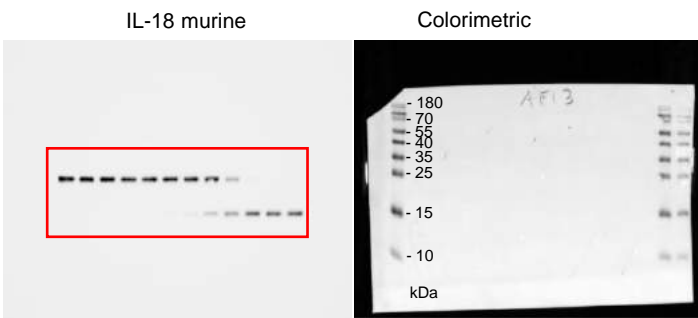

**Extended Data Figure 7e**

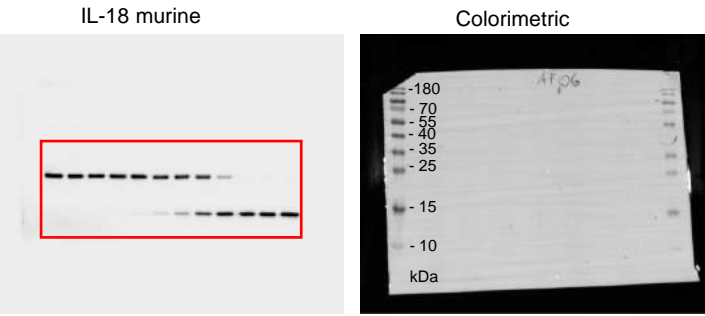

**Extended Data Figure 7h**

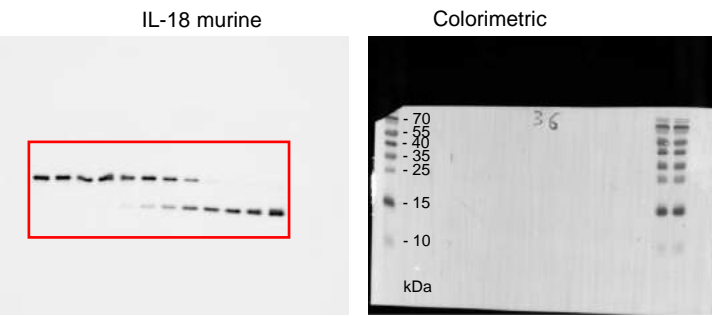

**Extended Data Figure 7g**

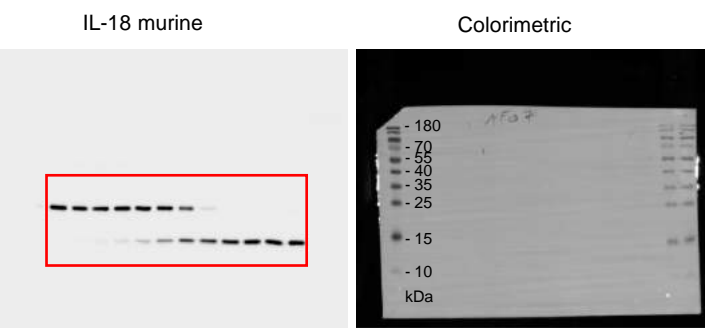

**Extended Data Figure 7i**

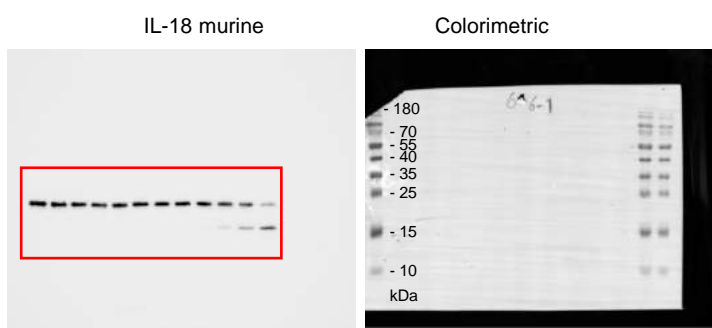

**Extended Data Figure 8c**

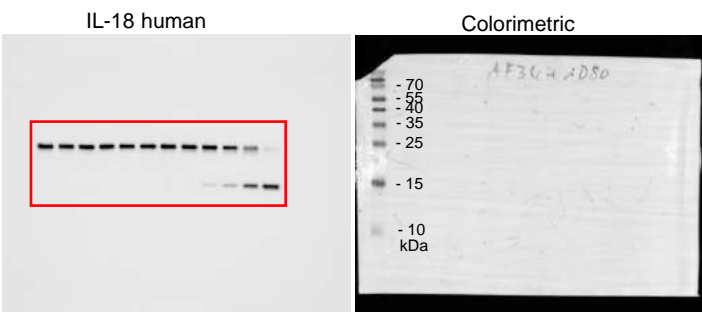

**Extended Data Figure 8d**

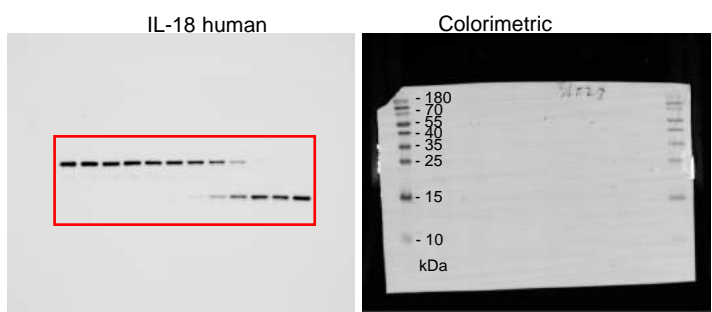

**Extended Data Figure 8e**

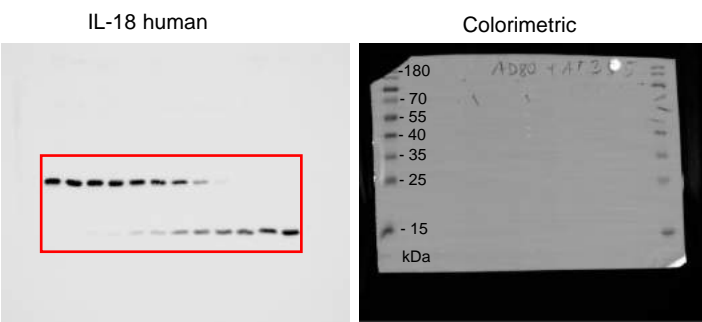

**Extended Data Figure 8h**

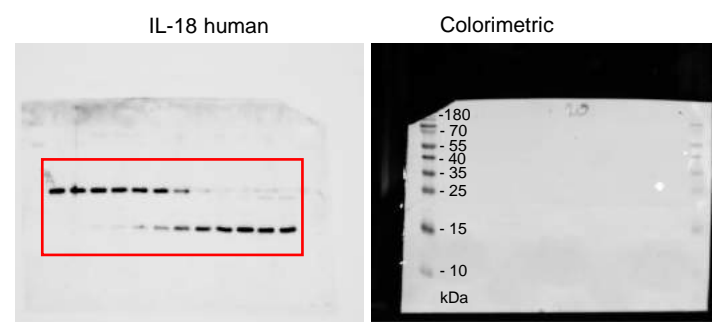

**Extended Data Figure 8i**

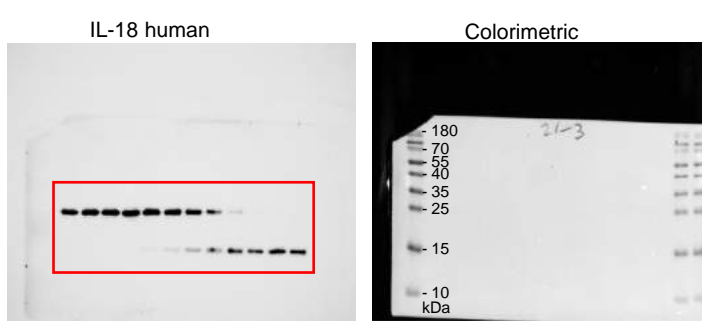

**Extended Data Figure 8k**

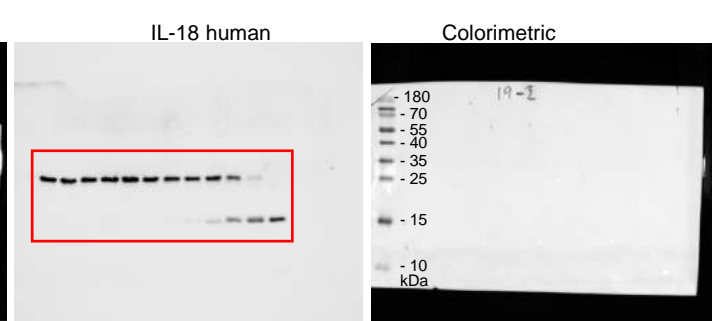

**Extended Data Figure 8j**

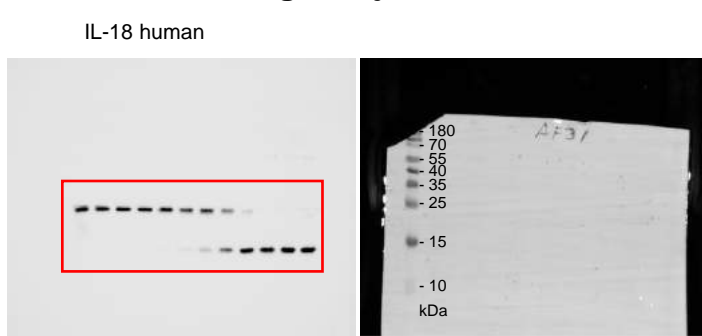

**Extended Data Fig 9a**

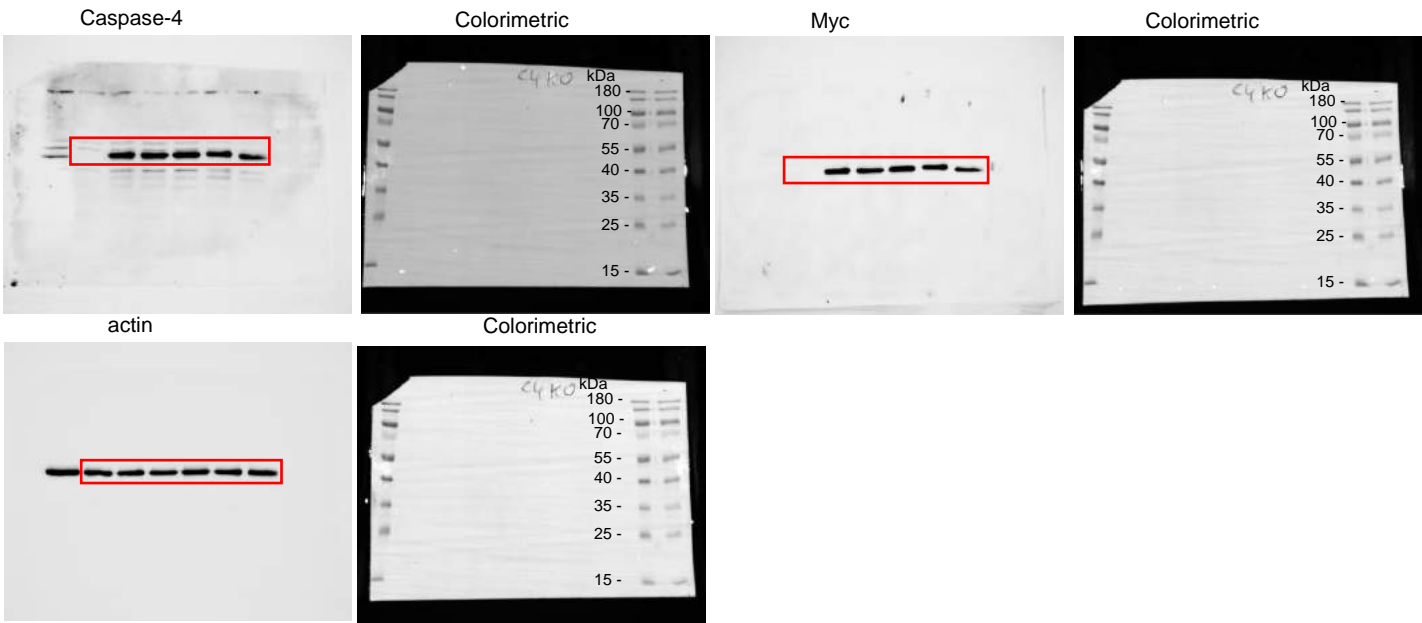

**Extended Data Figure 9c**

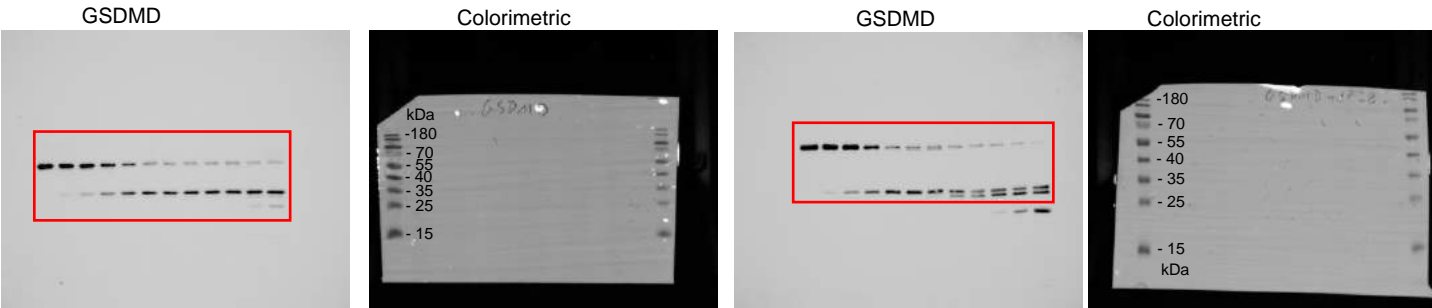

**Extended Data Figure 9e**

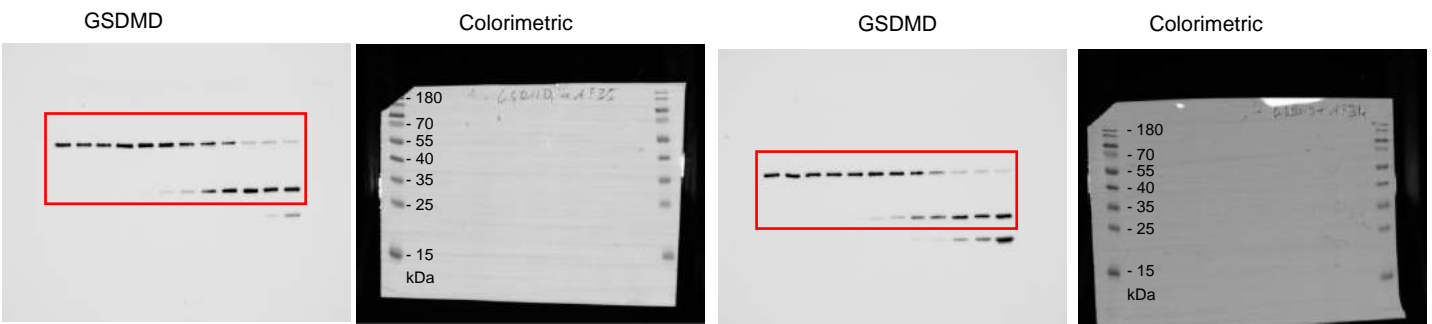

**Extended Data Figure 9d**

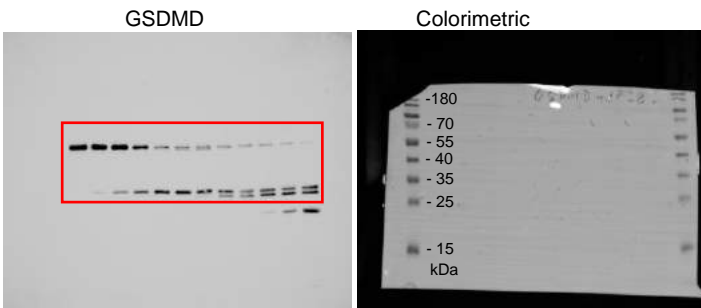

**Extended Data Figure 9f**

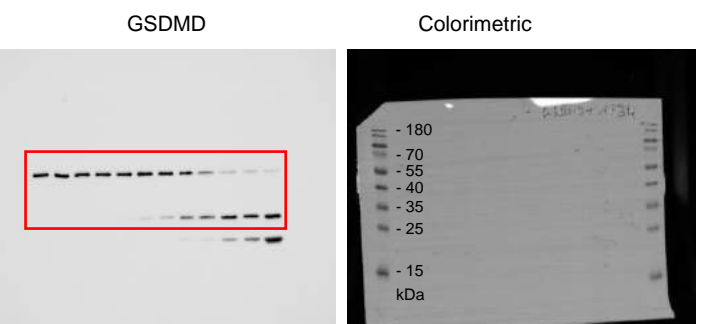

**Extended Data Fig 9g**

GSDMD

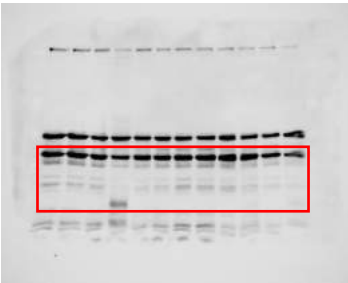

Colorimetric

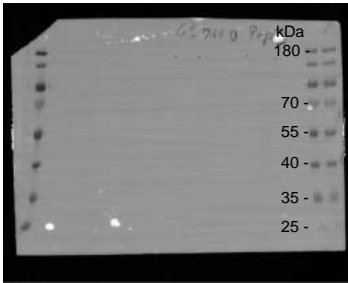

NT-GSDMD (separate blot)

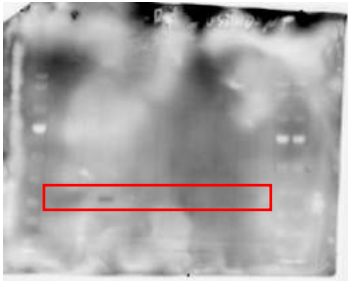

Colorimetric

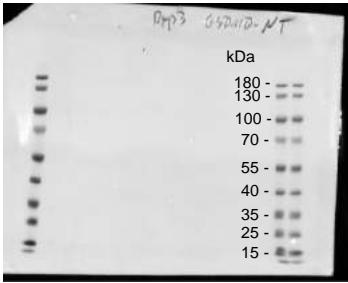

actin

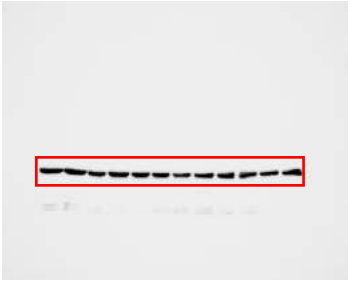

Colorimetric

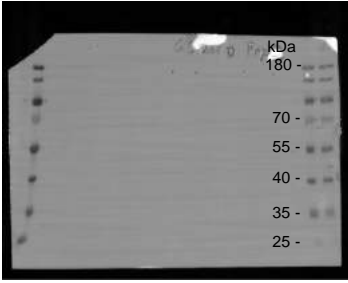

**Extended Data Fig 9h**

IL-18 short exposure

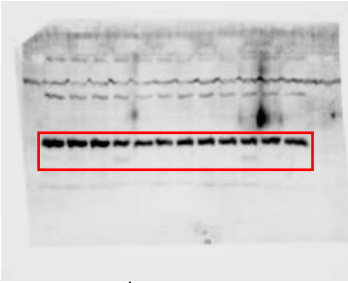

actin

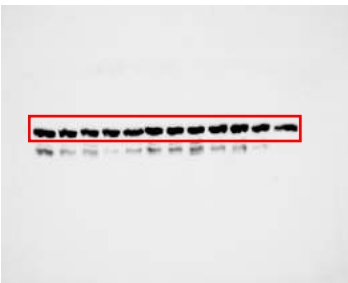

IL-18 long exposure

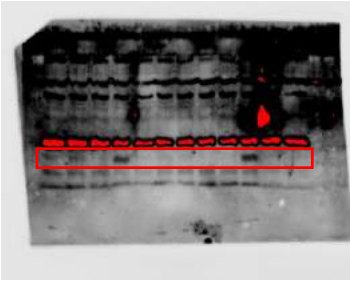

Colorimetric

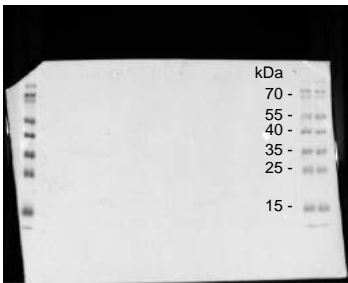

Colorimetric

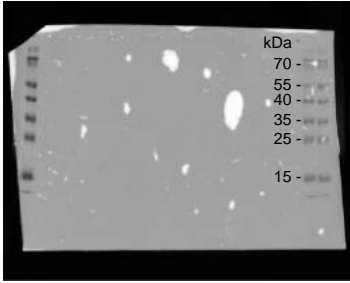

**Extended Data Fig 9i**

IL-18

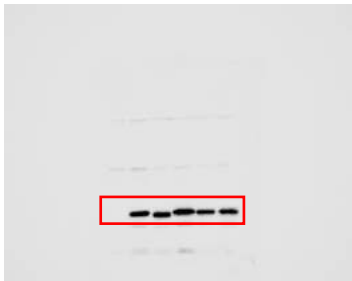

Colorimetric

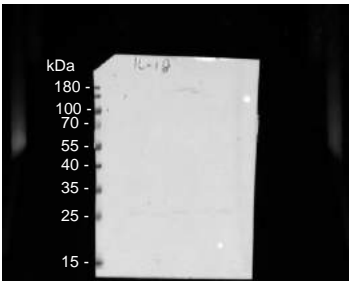

Myc

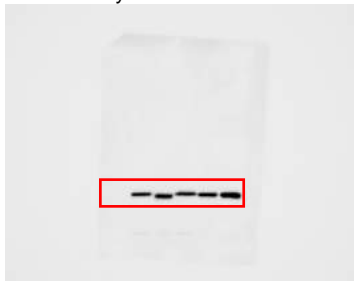

Colorimetric

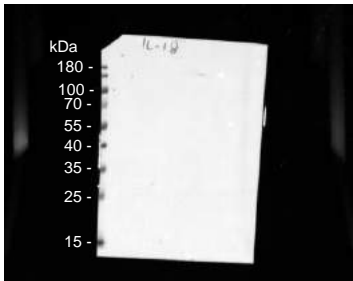

actin

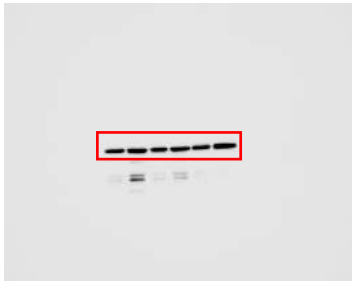

Colorimetric

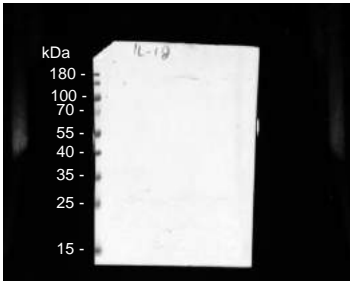

**Extended Data Figure 10a**

IL-18 human

Colorimetric

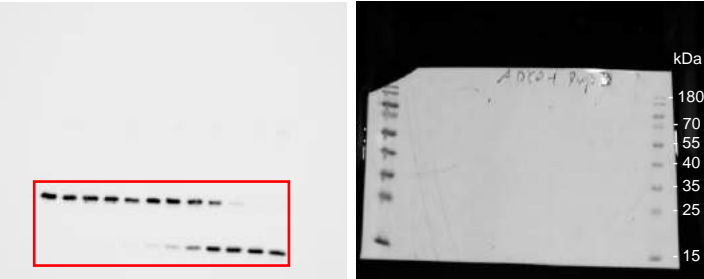

**Extended Data Figure 10b**

IL-18 human

Colorimetric

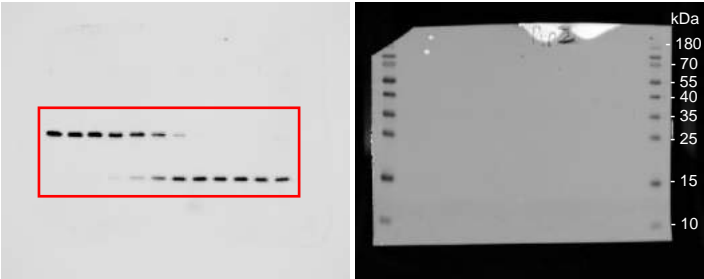

**Extended Data Figure 10c**

IL-18 human

Colorimetric

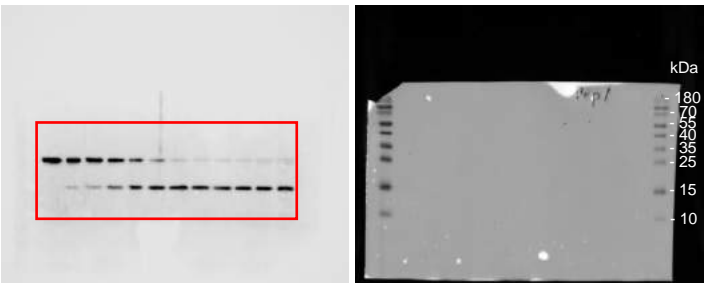

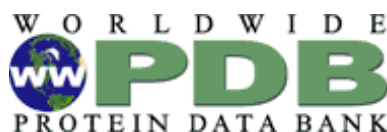

# Full wwPDB EM Validation Report ⓘ

May 4, 2023 – 12:17 PM EDT

PDB ID : 8SPB  
EMDB ID : EMD-40678  
Title : Caspase-4/Pro-IL-18 complex  
Deposited on : 2023-05-02  
Resolution : 3.20 Å(reported)

**This wwPDB validation report is for manuscript review**

This is a Full wwPDB EM Validation Report.

This report is produced by the wwPDB biocuration pipeline after annotation of the structure.

We welcome your comments at [validation@mail.wwpdb.org](mailto:validation@mail.wwpdb.org)

A user guide is available at

<https://www.wwpdb.org/validation/2017/EMValidationReportHelp>

with specific help available everywhere you see the ⓘ symbol.

The types of validation reports are described at

<https://www.wwpdb.org/validation/2017/FAQs#types>.

---

The following versions of software and data (see [references ⓘ](#)) were used in the production of this report:

|                                |   |                                                                    |
|--------------------------------|---|--------------------------------------------------------------------|
| EMDB validation analysis       | : | 0.0.1.dev50                                                        |
| MolProbity                     | : | 4.02b-467                                                          |
| Percentile statistics          | : | 20191225.v01 (using entries in the PDB archive December 25th 2019) |
| MapQ                           | : | 1.9.9                                                              |
| Ideal geometry (proteins)      | : | Engh & Huber (2001)                                                |
| Ideal geometry (DNA, RNA)      | : | Parkinson et al. (1996)                                            |
| Validation Pipeline (wwPDB-VP) | : | 2.32.2                                                             |

# 1 Overall quality at a glance i

The following experimental techniques were used to determine the structure:  
*ELECTRON MICROSCOPY*

The reported resolution of this entry is 3.20 Å.

Percentile scores (ranging between 0-100) for global validation metrics of the entry are shown in the following graphic. The table shows the number of entries on which the scores are based.

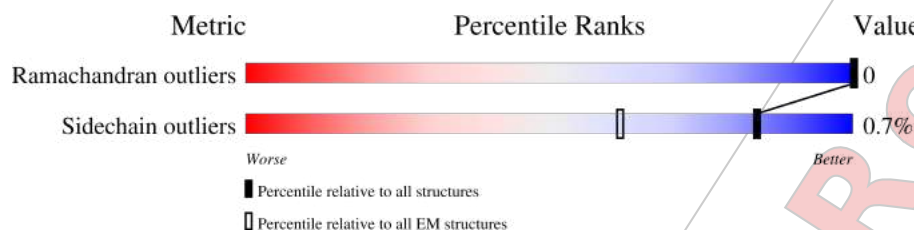

| Metric                | Whole archive<br>(#Entries) | EM structures<br>(#Entries) |
|-----------------------|-----------------------------|-----------------------------|
| Ramachandran outliers | 154571                      | 4023                        |
| Sidechain outliers    | 154315                      | 3826                        |

The table below summarises the geometric issues observed across the polymeric chains and their fit to the map. The red, orange, yellow and green segments of the bar indicate the fraction of residues that contain outliers for  $\geq 3$ , 2, 1 and 0 types of geometric quality criteria respectively. A grey segment represents the fraction of residues that are not modelled. The numeric value for each fraction is indicated below the corresponding segment, with a dot representing fractions  $\leq 5\%$ . The upper red bar (where present) indicates the fraction of residues that have poor fit to the EM map (all-atom inclusion  $< 40\%$ ). The numeric value is given above the bar.

| Mol | Chain | Length | Quality of chain                                                 |
|-----|-------|--------|------------------------------------------------------------------|
| 1   | A     | 207    | <div><div></div><div>80%</div><div>20%</div></div>               |
| 1   | a     | 207    | <div><div></div><div>80%</div><div>20%</div></div>               |
| 2   | C     | 220    | <div><div>8%</div><div>69%</div><div>.</div><div>30%</div></div> |
| 2   | c     | 220    | <div><div>8%</div><div>69%</div><div>.</div><div>30%</div></div> |
| 3   | B     | 88     | <div><div></div><div>100%</div></div>                            |
| 3   | b     | 88     | <div><div>.</div><div>99%</div><div>.</div></div>                |

## 2 Entry composition ⓘ

There are 3 unique types of molecules in this entry. The entry contains 6636 atoms, of which 0 are hydrogens and 0 are deuteriums.

In the tables below, the AltConf column contains the number of residues with at least one atom in alternate conformation and the Trace column contains the number of residues modelled with at most 2 atoms.

- Molecule 1 is a protein called Caspase-4 subunit p20.

| Mol | Chain | Residues | Atoms |     |     |     |   | AltConf | Trace |
|-----|-------|----------|-------|-----|-----|-----|---|---------|-------|
| 1   | A     | 166      | Total | C   | N   | O   | S | 0       | 0     |
|     |       |          | 1332  | 836 | 237 | 251 | 8 |         |       |
| 1   | a     | 166      | Total | C   | N   | O   | S | 0       | 0     |
|     |       |          | 1332  | 836 | 237 | 251 | 8 |         |       |

There are 62 discrepancies between the modelled and reference sequences:

| Chain | Residue | Modelled | Actual | Comment        | Reference  |
|-------|---------|----------|--------|----------------|------------|
| A     | 64      | MET      | -      | expression tag | UNP P49662 |
| A     | 65      | GLY      | -      | expression tag | UNP P49662 |
| A     | 66      | SER      | -      | expression tag | UNP P49662 |
| A     | 67      | SER      | -      | expression tag | UNP P49662 |
| A     | 68      | HIS      | -      | expression tag | UNP P49662 |
| A     | 69      | HIS      | -      | expression tag | UNP P49662 |
| A     | 70      | HIS      | -      | expression tag | UNP P49662 |
| A     | 71      | HIS      | -      | expression tag | UNP P49662 |
| A     | 72      | HIS      | -      | expression tag | UNP P49662 |
| A     | 73      | HIS      | -      | expression tag | UNP P49662 |
| A     | 74      | SER      | -      | expression tag | UNP P49662 |
| A     | 75      | SER      | -      | expression tag | UNP P49662 |
| A     | 76      | GLY      | -      | expression tag | UNP P49662 |
| A     | 77      | LEU      | -      | expression tag | UNP P49662 |
| A     | 78      | VAL      | -      | expression tag | UNP P49662 |
| A     | 79      | PRO      | -      | expression tag | UNP P49662 |
| A     | 80      | ARG      | -      | expression tag | UNP P49662 |
| A     | 81      | GLY      | -      | expression tag | UNP P49662 |
| A     | 82      | SER      | -      | expression tag | UNP P49662 |
| A     | 83      | HIS      | -      | expression tag | UNP P49662 |
| A     | 84      | MET      | -      | expression tag | UNP P49662 |
| A     | 85      | GLU      | -      | expression tag | UNP P49662 |
| A     | 86      | ASN      | -      | expression tag | UNP P49662 |
| A     | 87      | LEU      | -      | expression tag | UNP P49662 |
| A     | 88      | TYR      | -      | expression tag | UNP P49662 |
| A     | 89      | PHE      | -      | expression tag | UNP P49662 |

*Continued on next page...*

Continued from previous page...

| Chain | Residue | Modelled | Actual | Comment        | Reference  |
|-------|---------|----------|--------|----------------|------------|
| A     | 90      | GLN      | -      | expression tag | UNP P49662 |
| A     | 91      | GLY      | -      | expression tag | UNP P49662 |
| A     | 92      | GLY      | -      | expression tag | UNP P49662 |
| A     | 93      | SER      | -      | expression tag | UNP P49662 |
| A     | 258     | ALA      | CYS    | conflict       | UNP P49662 |
| a     | 64      | MET      | -      | expression tag | UNP P49662 |
| a     | 65      | GLY      | -      | expression tag | UNP P49662 |
| a     | 66      | SER      | -      | expression tag | UNP P49662 |
| a     | 67      | SER      | -      | expression tag | UNP P49662 |
| a     | 68      | HIS      | -      | expression tag | UNP P49662 |
| a     | 69      | HIS      | -      | expression tag | UNP P49662 |
| a     | 70      | HIS      | -      | expression tag | UNP P49662 |
| a     | 71      | HIS      | -      | expression tag | UNP P49662 |
| a     | 72      | HIS      | -      | expression tag | UNP P49662 |
| a     | 73      | HIS      | -      | expression tag | UNP P49662 |
| a     | 74      | SER      | -      | expression tag | UNP P49662 |
| a     | 75      | SER      | -      | expression tag | UNP P49662 |
| a     | 76      | GLY      | -      | expression tag | UNP P49662 |
| a     | 77      | LEU      | -      | expression tag | UNP P49662 |
| a     | 78      | VAL      | -      | expression tag | UNP P49662 |
| a     | 79      | PRO      | -      | expression tag | UNP P49662 |
| a     | 80      | ARG      | -      | expression tag | UNP P49662 |
| a     | 81      | GLY      | -      | expression tag | UNP P49662 |
| a     | 82      | SER      | -      | expression tag | UNP P49662 |
| a     | 83      | HIS      | -      | expression tag | UNP P49662 |
| a     | 84      | MET      | -      | expression tag | UNP P49662 |
| a     | 85      | GLU      | -      | expression tag | UNP P49662 |
| a     | 86      | ASN      | -      | expression tag | UNP P49662 |
| a     | 87      | LEU      | -      | expression tag | UNP P49662 |
| a     | 88      | TYR      | -      | expression tag | UNP P49662 |
| a     | 89      | PHE      | -      | expression tag | UNP P49662 |
| a     | 90      | GLN      | -      | expression tag | UNP P49662 |
| a     | 91      | GLY      | -      | expression tag | UNP P49662 |
| a     | 92      | GLY      | -      | expression tag | UNP P49662 |
| a     | 93      | SER      | -      | expression tag | UNP P49662 |
| a     | 258     | ALA      | CYS    | conflict       | UNP P49662 |

- Molecule 2 is a protein called Interleukin-18.

| Mol | Chain | Residues | Atoms |     |     |     |    | AltConf | Trace |
|-----|-------|----------|-------|-----|-----|-----|----|---------|-------|
| 2   | C     | 154      | Total | C   | N   | O   | S  | 0       | 0     |
|     |       |          | 1255  | 797 | 198 | 250 | 10 |         |       |

Continued on next page...

Continued from previous page...

| Mol | Chain | Residues | Atoms |     |     |     |    | AltConf | Trace |
|-----|-------|----------|-------|-----|-----|-----|----|---------|-------|
| 2   | c     | 154      | Total | C   | N   | O   | S  | 0       | 0     |
|     |       |          | 1255  | 797 | 198 | 250 | 10 |         |       |

There are 56 discrepancies between the modelled and reference sequences:

| Chain | Residue | Modelled | Actual | Comment        | Reference  |
|-------|---------|----------|--------|----------------|------------|
| C     | -26     | MET      | -      | expression tag | UNP Q14116 |
| C     | -25     | SER      | -      | expression tag | UNP Q14116 |
| C     | -24     | TYR      | -      | expression tag | UNP Q14116 |
| C     | -23     | TYR      | -      | expression tag | UNP Q14116 |
| C     | -22     | HIS      | -      | expression tag | UNP Q14116 |
| C     | -21     | HIS      | -      | expression tag | UNP Q14116 |
| C     | -20     | HIS      | -      | expression tag | UNP Q14116 |
| C     | -19     | HIS      | -      | expression tag | UNP Q14116 |
| C     | -18     | HIS      | -      | expression tag | UNP Q14116 |
| C     | -17     | HIS      | -      | expression tag | UNP Q14116 |
| C     | -16     | ASP      | -      | expression tag | UNP Q14116 |
| C     | -15     | TYR      | -      | expression tag | UNP Q14116 |
| C     | -14     | ASP      | -      | expression tag | UNP Q14116 |
| C     | -13     | ILE      | -      | expression tag | UNP Q14116 |
| C     | -12     | PRO      | -      | expression tag | UNP Q14116 |
| C     | -11     | THR      | -      | expression tag | UNP Q14116 |
| C     | -10     | THR      | -      | expression tag | UNP Q14116 |
| C     | -9      | GLU      | -      | expression tag | UNP Q14116 |
| C     | -8      | ASN      | -      | expression tag | UNP Q14116 |
| C     | -7      | LEU      | -      | expression tag | UNP Q14116 |
| C     | -6      | TYR      | -      | expression tag | UNP Q14116 |
| C     | -5      | PHE      | -      | expression tag | UNP Q14116 |
| C     | -4      | GLN      | -      | expression tag | UNP Q14116 |
| C     | -3      | GLY      | -      | expression tag | UNP Q14116 |
| C     | -2      | ALA      | -      | expression tag | UNP Q14116 |
| C     | -1      | MET      | -      | expression tag | UNP Q14116 |
| C     | 0       | GLY      | -      | expression tag | UNP Q14116 |
| C     | 1       | SER      | -      | expression tag | UNP Q14116 |
| c     | -26     | MET      | -      | expression tag | UNP Q14116 |
| c     | -25     | SER      | -      | expression tag | UNP Q14116 |
| c     | -24     | TYR      | -      | expression tag | UNP Q14116 |
| c     | -23     | TYR      | -      | expression tag | UNP Q14116 |
| c     | -22     | HIS      | -      | expression tag | UNP Q14116 |
| c     | -21     | HIS      | -      | expression tag | UNP Q14116 |
| c     | -20     | HIS      | -      | expression tag | UNP Q14116 |
| c     | -19     | HIS      | -      | expression tag | UNP Q14116 |

Continued on next page...

Continued from previous page...

| Chain | Residue | Modelled | Actual | Comment        | Reference  |
|-------|---------|----------|--------|----------------|------------|
| c     | -18     | HIS      | -      | expression tag | UNP Q14116 |
| c     | -17     | HIS      | -      | expression tag | UNP Q14116 |
| c     | -16     | ASP      | -      | expression tag | UNP Q14116 |
| c     | -15     | TYR      | -      | expression tag | UNP Q14116 |
| c     | -14     | ASP      | -      | expression tag | UNP Q14116 |
| c     | -13     | ILE      | -      | expression tag | UNP Q14116 |
| c     | -12     | PRO      | -      | expression tag | UNP Q14116 |
| c     | -11     | THR      | -      | expression tag | UNP Q14116 |
| c     | -10     | THR      | -      | expression tag | UNP Q14116 |
| c     | -9      | GLU      | -      | expression tag | UNP Q14116 |
| c     | -8      | ASN      | -      | expression tag | UNP Q14116 |
| c     | -7      | LEU      | -      | expression tag | UNP Q14116 |
| c     | -6      | TYR      | -      | expression tag | UNP Q14116 |
| c     | -5      | PHE      | -      | expression tag | UNP Q14116 |
| c     | -4      | GLN      | -      | expression tag | UNP Q14116 |
| c     | -3      | GLY      | -      | expression tag | UNP Q14116 |
| c     | -2      | ALA      | -      | expression tag | UNP Q14116 |
| c     | -1      | MET      | -      | expression tag | UNP Q14116 |
| c     | 0       | GLY      | -      | expression tag | UNP Q14116 |
| c     | 1       | SER      | -      | expression tag | UNP Q14116 |

- Molecule 3 is a protein called Caspase-4 subunit p10.

| Mol | Chain | Residues | Atoms |     |     |     | AltConf | Trace |
|-----|-------|----------|-------|-----|-----|-----|---------|-------|
| 3   | B     | 88       | Total | C   | N   | O   | S       |       |
|     |       |          | 731   | 472 | 123 | 129 | 7       | 0     |
| 3   | b     | 88       | Total | C   | N   | O   | S       |       |
|     |       |          | 731   | 472 | 123 | 129 | 7       | 0     |

- Molecule 1: Caspase-4 subunit p20

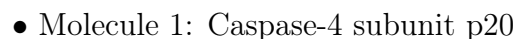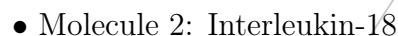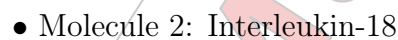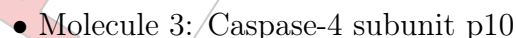

Chain B: 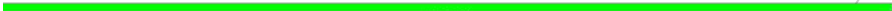 100%

There are no outlier residues recorded for this chain.

- Molecule 3: Caspase-4 subunit p10

Chain b: 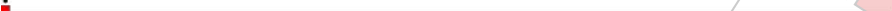 99%

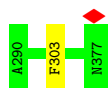

## 4 Experimental information ⓘ

| Property                             | Value                  | Source    |
|--------------------------------------|------------------------|-----------|
| EM reconstruction method             | SINGLE PARTICLE        | Depositor |
| Imposed symmetry                     | POINT, Not provided    |           |
| Number of particles used             | 200000                 | Depositor |
| Resolution determination method      | FSC 0.143 CUT-OFF      | Depositor |
| CTF correction method                | NONE                   | Depositor |
| Microscope                           | FEI TITAN KRIOS        | Depositor |
| Voltage (kV)                         | 300                    | Depositor |
| Electron dose ( $e^-/\text{\AA}^2$ ) | 55                     | Depositor |
| Minimum defocus (nm)                 | 1000                   | Depositor |
| Maximum defocus (nm)                 | 2500                   | Depositor |
| Magnification                        | Not provided           |           |
| Image detector                       | GATAN K3 (6k x 4k)     | Depositor |
| Maximum map value                    | 3.493                  | Depositor |
| Minimum map value                    | -2.387                 | Depositor |
| Average map value                    | -0.000                 | Depositor |
| Map value standard deviation         | 0.065                  | Depositor |
| Recommended contour level            | 0.15                   | Depositor |
| Map size (Å)                         | 222.44, 222.44, 222.44 | wwPDB     |
| Map dimensions                       | 268, 268, 268          | wwPDB     |
| Map angles (°)                       | 90.0, 90.0, 90.0       | wwPDB     |
| Pixel spacing (Å)                    | 0.83, 0.83, 0.83       | Depositor |

## 5 Model quality [i](#)

### 5.1 Standard geometry [i](#)

The Z score for a bond length (or angle) is the number of standard deviations the observed value is removed from the expected value. A bond length (or angle) with  $|Z| > 5$  is considered an outlier worth inspection. RMSZ is the root-mean-square of all Z scores of the bond lengths (or angles).

| Mol | Chain | Bond lengths |         | Bond angles |         |
|-----|-------|--------------|---------|-------------|---------|
|     |       | RMSZ         | # Z  >5 | RMSZ        | # Z  >5 |
| 1   | A     | 0.27         | 0/1355  | 0.56        | 0/1828  |
| 1   | a     | 0.26         | 0/1355  | 0.52        | 0/1828  |
| 2   | C     | 0.25         | 0/1274  | 0.55        | 0/1706  |
| 2   | c     | 0.25         | 0/1274  | 0.55        | 0/1706  |
| 3   | B     | 0.27         | 0/753   | 0.51        | 0/1018  |
| 3   | b     | 0.29         | 0/753   | 0.53        | 0/1018  |
| All | All   | 0.26         | 0/6764  | 0.54        | 0/9104  |

There are no bond length outliers.

There are no bond angle outliers.

There are no chirality outliers.

There are no planarity outliers.

### 5.2 Too-close contacts [i](#)

Due to software issues we are unable to calculate clashes - this section is therefore empty.

### 5.3 Torsion angles [i](#)

#### 5.3.1 Protein backbone [i](#)

In the following table, the Percentiles column shows the percent Ramachandran outliers of the chain as a percentile score with respect to all PDB entries followed by that with respect to all EM entries.

The Analysed column shows the number of residues for which the backbone conformation was analysed, and the total number of residues.

| Mol | Chain | Analysed      | Favoured  | Allowed | Outliers | Percentiles |     |
|-----|-------|---------------|-----------|---------|----------|-------------|-----|
| 1   | A     | 164/207 (79%) | 160 (98%) | 4 (2%)  | 0        | 100         | 100 |

*Continued on next page...*

*Continued from previous page...*

| Mol | Chain | Analysed       | Favoured  | Allowed  | Outliers | Percentiles |     |
|-----|-------|----------------|-----------|----------|----------|-------------|-----|
| 1   | a     | 164/207 (79%)  | 157 (96%) | 7 (4%)   | 0        | 100         | 100 |
| 2   | C     | 148/220 (67%)  | 129 (87%) | 19 (13%) | 0        | 100         | 100 |
| 2   | c     | 148/220 (67%)  | 129 (87%) | 19 (13%) | 0        | 100         | 100 |
| 3   | B     | 86/88 (98%)    | 83 (96%)  | 3 (4%)   | 0        | 100         | 100 |
| 3   | b     | 86/88 (98%)    | 81 (94%)  | 5 (6%)   | 0        | 100         | 100 |
| All | All   | 796/1030 (77%) | 739 (93%) | 57 (7%)  | 0        | 100         | 100 |

There are no Ramachandran outliers to report.

### 5.3.2 Protein sidechains ⓘ

In the following table, the Percentiles column shows the percent sidechain outliers of the chain as a percentile score with respect to all PDB entries followed by that with respect to all EM entries.

The Analysed column shows the number of residues for which the sidechain conformation was analysed, and the total number of residues.

| Mol | Chain | Analysed      | Rotameric  | Outliers | Percentiles |     |
|-----|-------|---------------|------------|----------|-------------|-----|
| 1   | A     | 147/180 (82%) | 147 (100%) | 0        | 100         | 100 |
| 1   | a     | 147/180 (82%) | 147 (100%) | 0        | 100         | 100 |
| 2   | C     | 146/204 (72%) | 144 (99%)  | 2 (1%)   | 67          | 86  |
| 2   | c     | 146/204 (72%) | 144 (99%)  | 2 (1%)   | 67          | 86  |
| 3   | B     | 82/82 (100%)  | 82 (100%)  | 0        | 100         | 100 |
| 3   | b     | 82/82 (100%)  | 81 (99%)   | 1 (1%)   | 71          | 88  |
| All | All   | 750/932 (80%) | 745 (99%)  | 5 (1%)   | 84          | 94  |

All (5) residues with a non-rotameric sidechain are listed below:

| Mol | Chain | Res | Type |
|-----|-------|-----|------|
| 2   | C     | 25  | PHE  |
| 2   | C     | 160 | PHE  |
| 3   | b     | 303 | PHE  |
| 2   | c     | 25  | PHE  |
| 2   | c     | 160 | PHE  |

Sometimes sidechains can be flipped to improve hydrogen bonding and reduce clashes. There are no such sidechains identified.

### 5.3.3 RNA [i](#)

There are no RNA molecules in this entry.

### 5.4 Non-standard residues in protein, DNA, RNA chains [i](#)

There are no non-standard protein/DNA/RNA residues in this entry.

### 5.5 Carbohydrates [i](#)

There are no monosaccharides in this entry.

### 5.6 Ligand geometry [i](#)

There are no ligands in this entry.

### 5.7 Other polymers [i](#)

There are no such residues in this entry.

### 5.8 Polymer linkage issues [i](#)

There are no chain breaks in this entry.

## 6 Map visualisation [i](#)

This section contains visualisations of the EMDB entry EMD-40678. These allow visual inspection of the internal detail of the map and identification of artifacts.

Images derived from a raw map, generated by summing the deposited half-maps, are presented below the corresponding image components of the primary map to allow further visual inspection and comparison with those of the primary map.

### 6.1 Orthogonal projections [i](#)

#### 6.1.1 Primary map

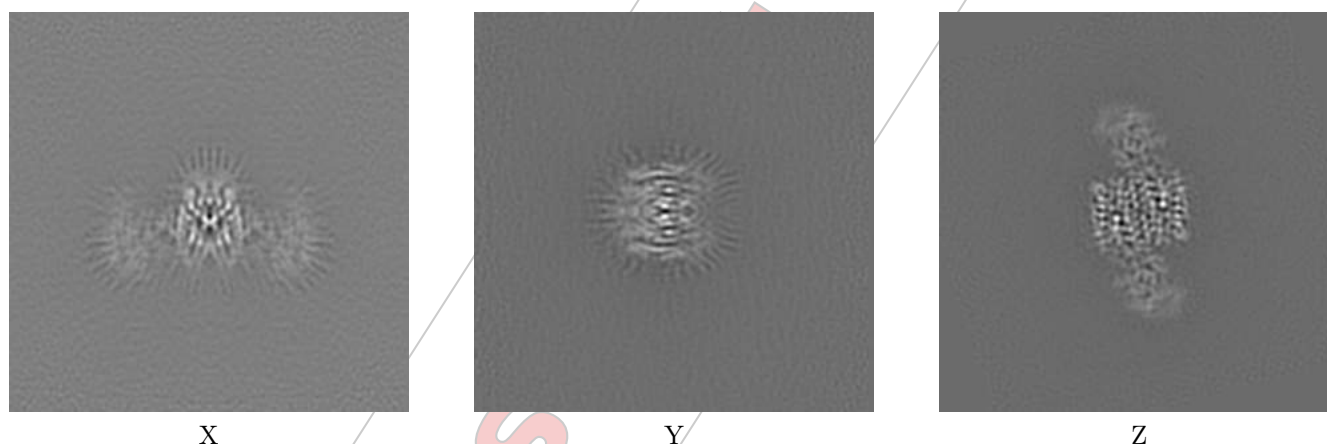

#### 6.1.2 Raw map

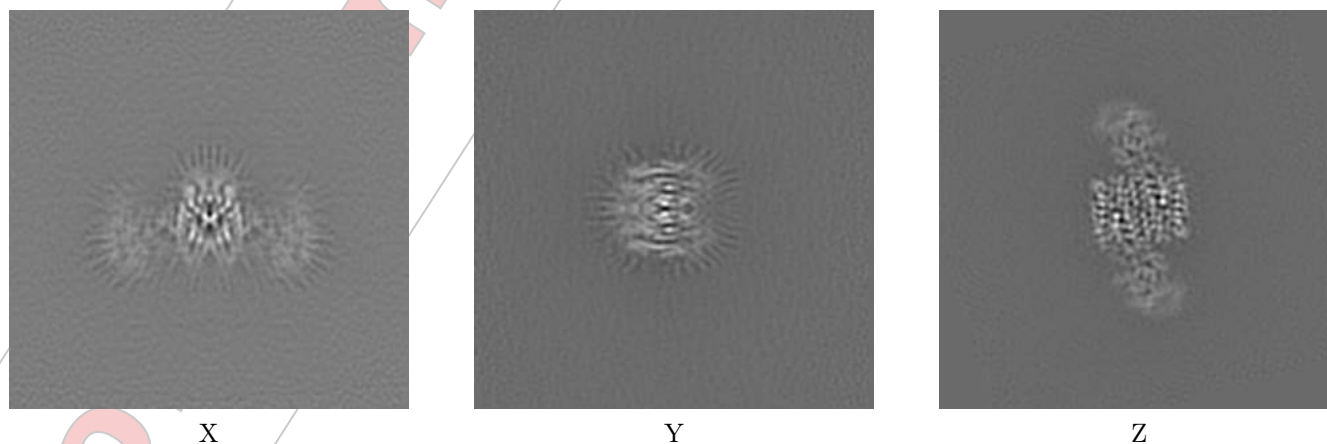

The images above show the map projected in three orthogonal directions.

## 6.2 Central slices [i](#)

### 6.2.1 Primary map

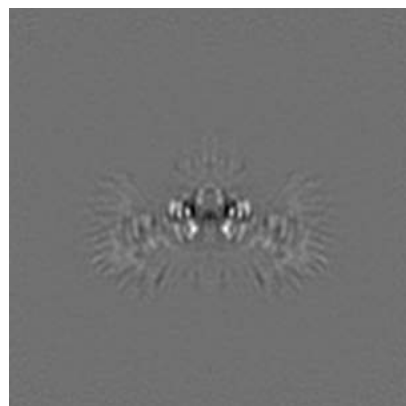

X Index: 134

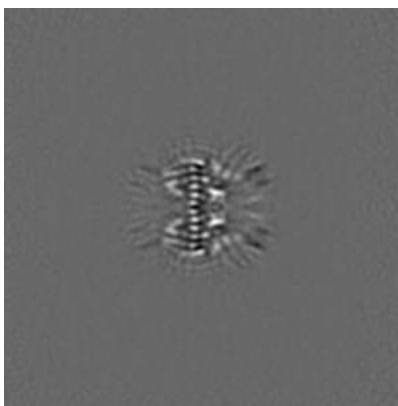

Y Index: 134

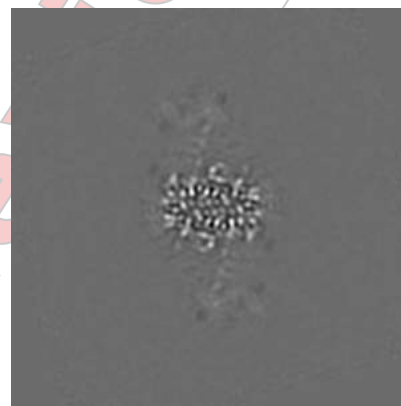

Z Index: 134

### 6.2.2 Raw map

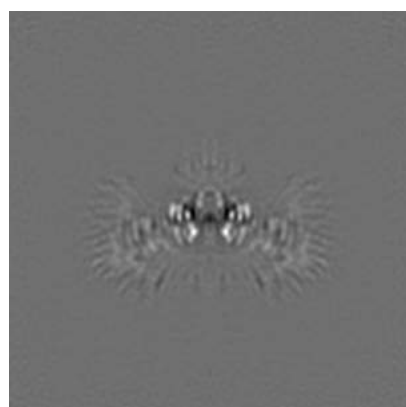

X Index: 134

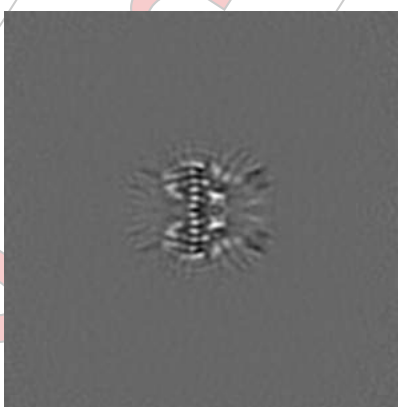

Y Index: 134

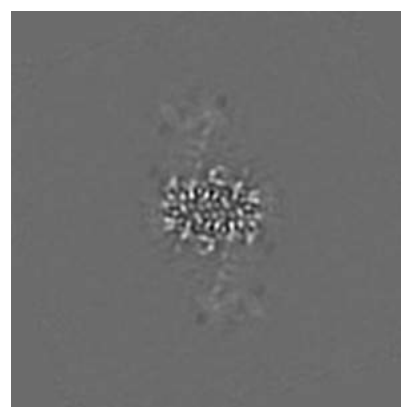

Z Index: 134

The images above show central slices of the map in three orthogonal directions.

## 6.3 Largest variance slices [i](#)

### 6.3.1 Primary map

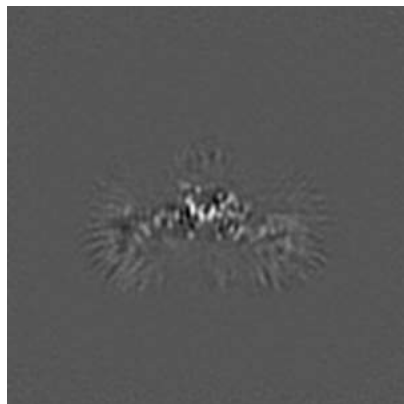

X Index: 137

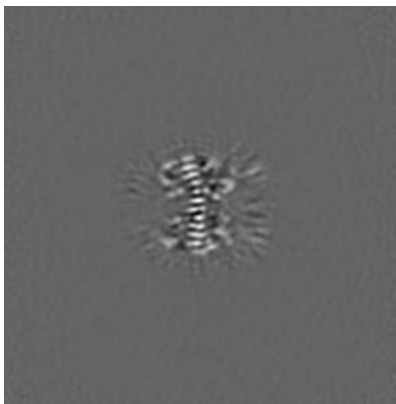

Y Index: 137

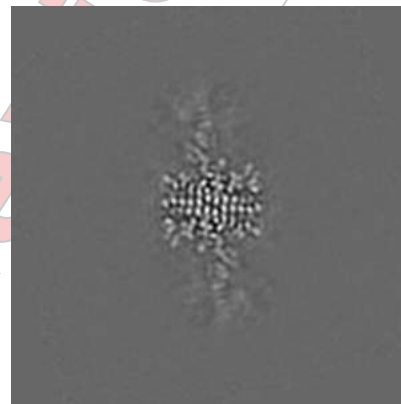

Z Index: 129

### 6.3.2 Raw map

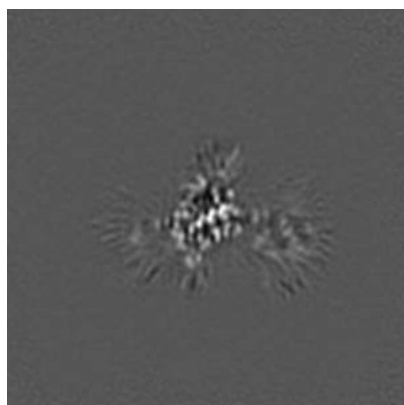

X Index: 120

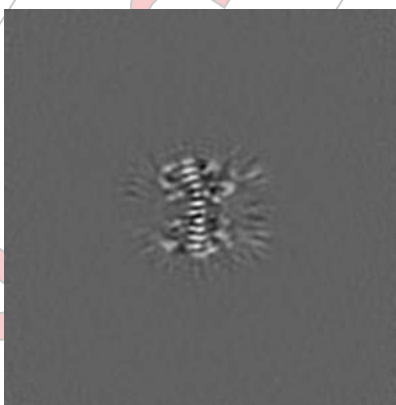

Y Index: 137

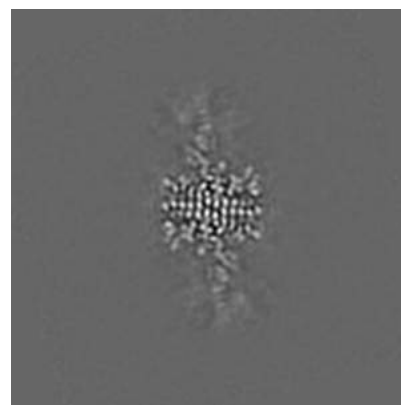

Z Index: 129

The images above show the largest variance slices of the map in three orthogonal directions.

## 6.4 Orthogonal standard-deviation projections (False-color) [i](#)

### 6.4.1 Primary map

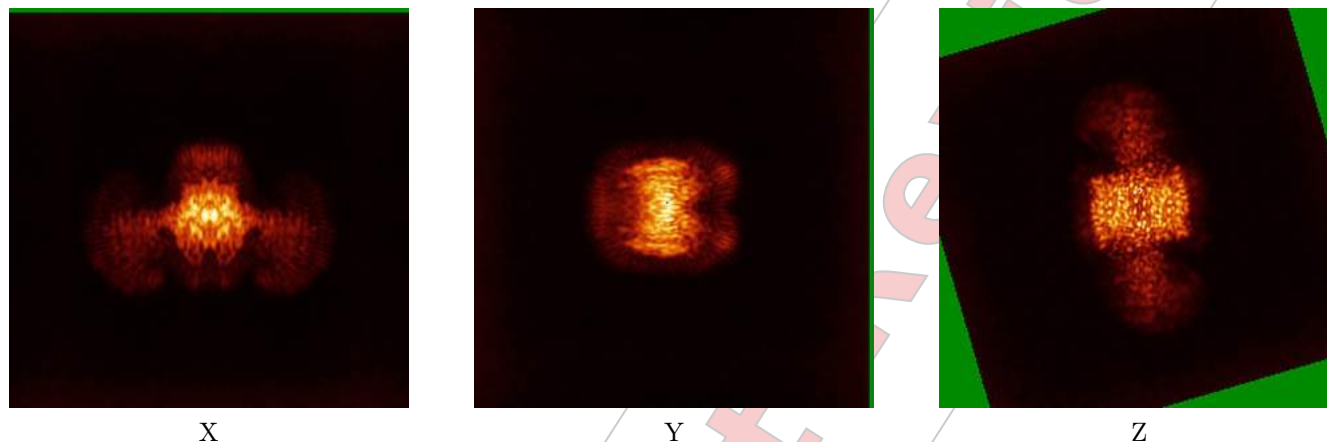

### 6.4.2 Raw map

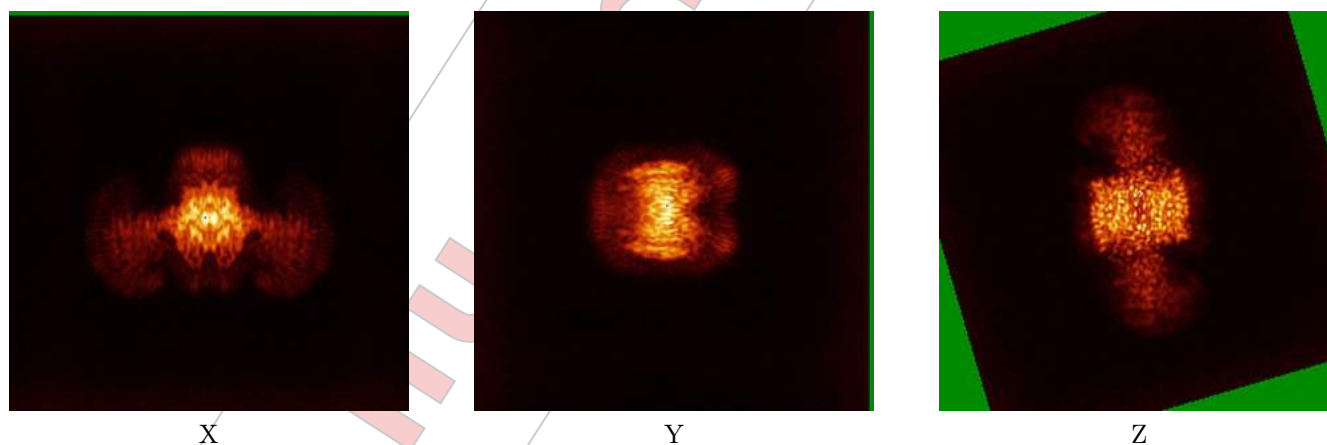

The images above show the map standard deviation projections with false color in three orthogonal directions. Minimum values are shown in green, max in blue, and dark to light orange shades represent small to large values respectively.

## 6.5 Orthogonal surface views [i](#)

### 6.5.1 Primary map

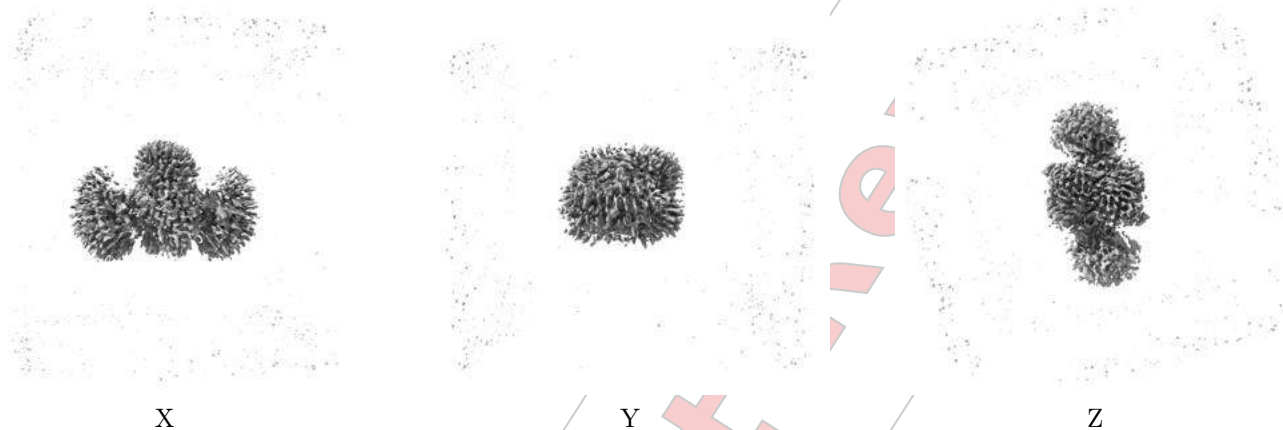

The images above show the 3D surface view of the map at the recommended contour level 0.15. These images, in conjunction with the slice images, may facilitate assessment of whether an appropriate contour level has been provided.

### 6.5.2 Raw map

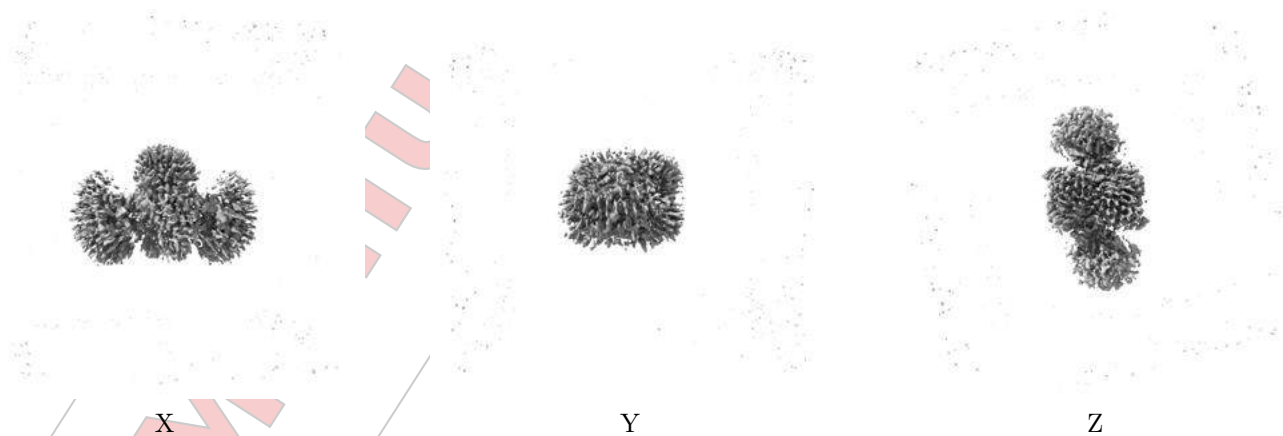

These images show the 3D surface of the raw map. The raw map's contour level was selected so that its surface encloses the same volume as the primary map does at its recommended contour level.

## 6.6 Mask visualisation [i](#)

This section was not generated. No masks/segmentation were deposited.

## 7 Map analysis [i](#)

This section contains the results of statistical analysis of the map.

### 7.1 Map-value distribution [i](#)

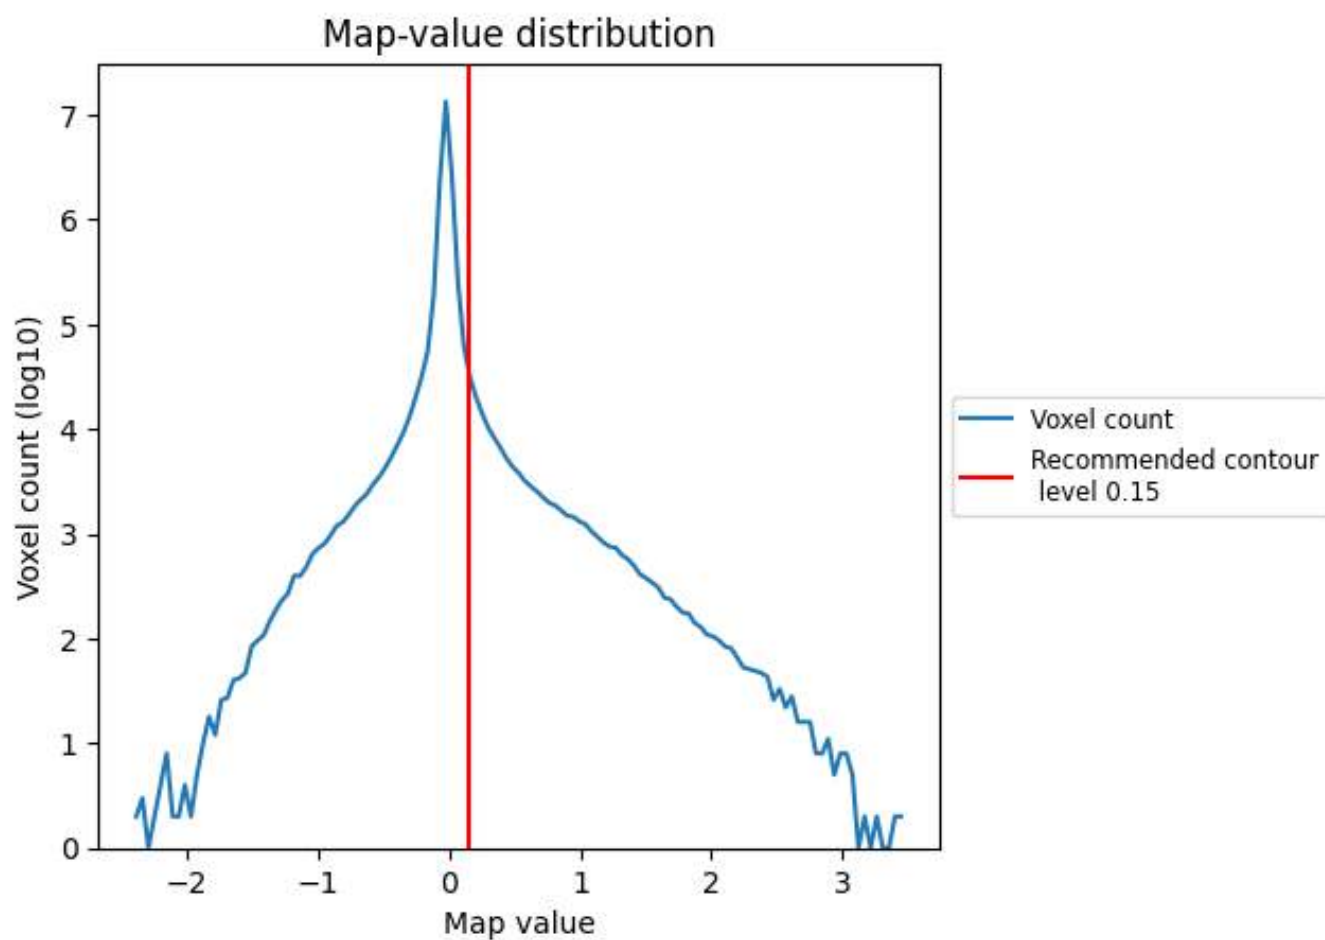

The map-value distribution is plotted in 128 intervals along the x-axis. The y-axis is logarithmic. A spike in this graph at zero usually indicates that the volume has been masked.

## 7.2 Volume estimate [i](#)

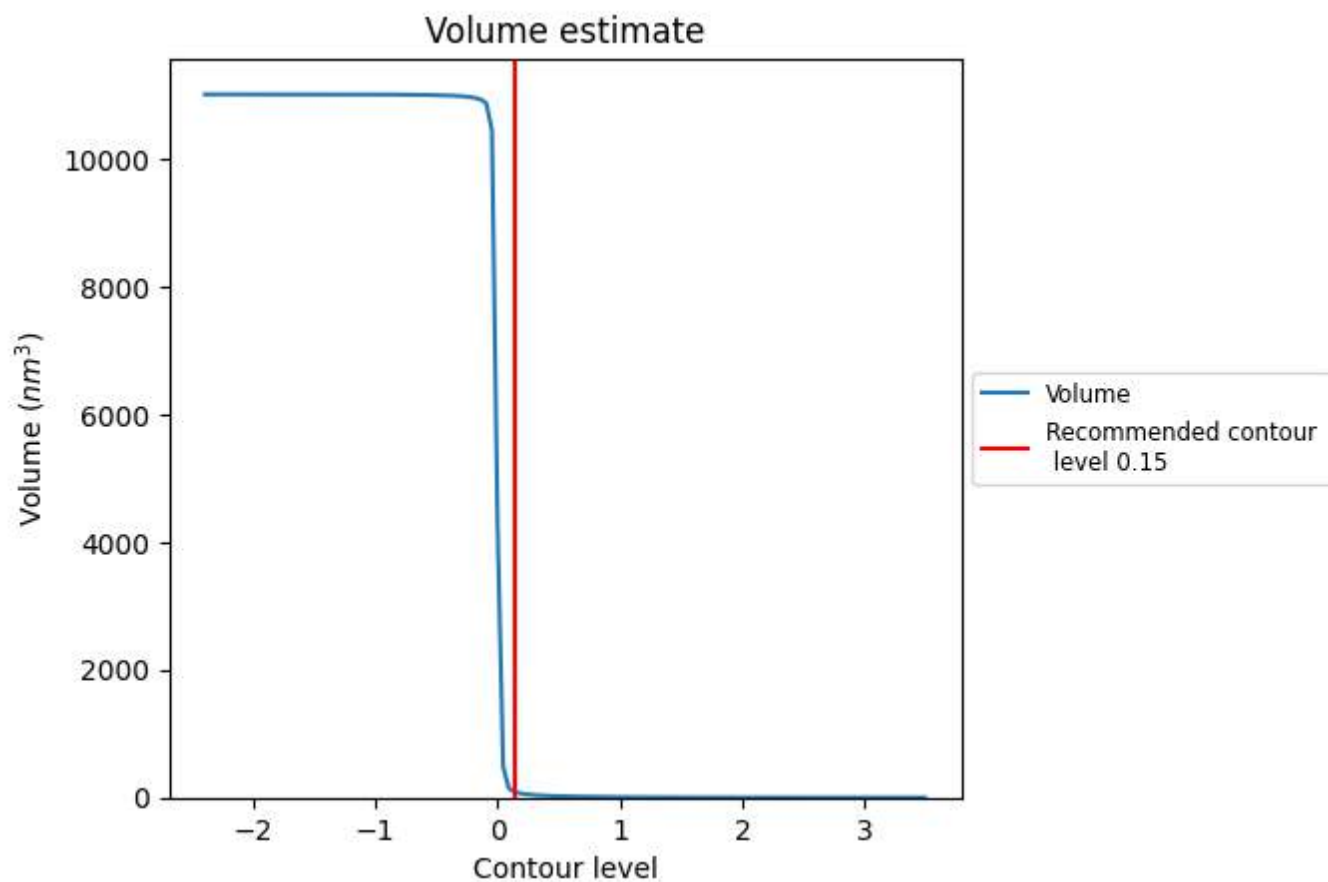

The volume at the recommended contour level is 84  $\text{nm}^3$ ; this corresponds to an approximate mass of 75 kDa.

The volume estimate graph shows how the enclosed volume varies with the contour level. The recommended contour level is shown as a vertical line and the intersection between the line and the curve gives the volume of the enclosed surface at the given level.

### 7.3 Rotationally averaged power spectrum ⓘ

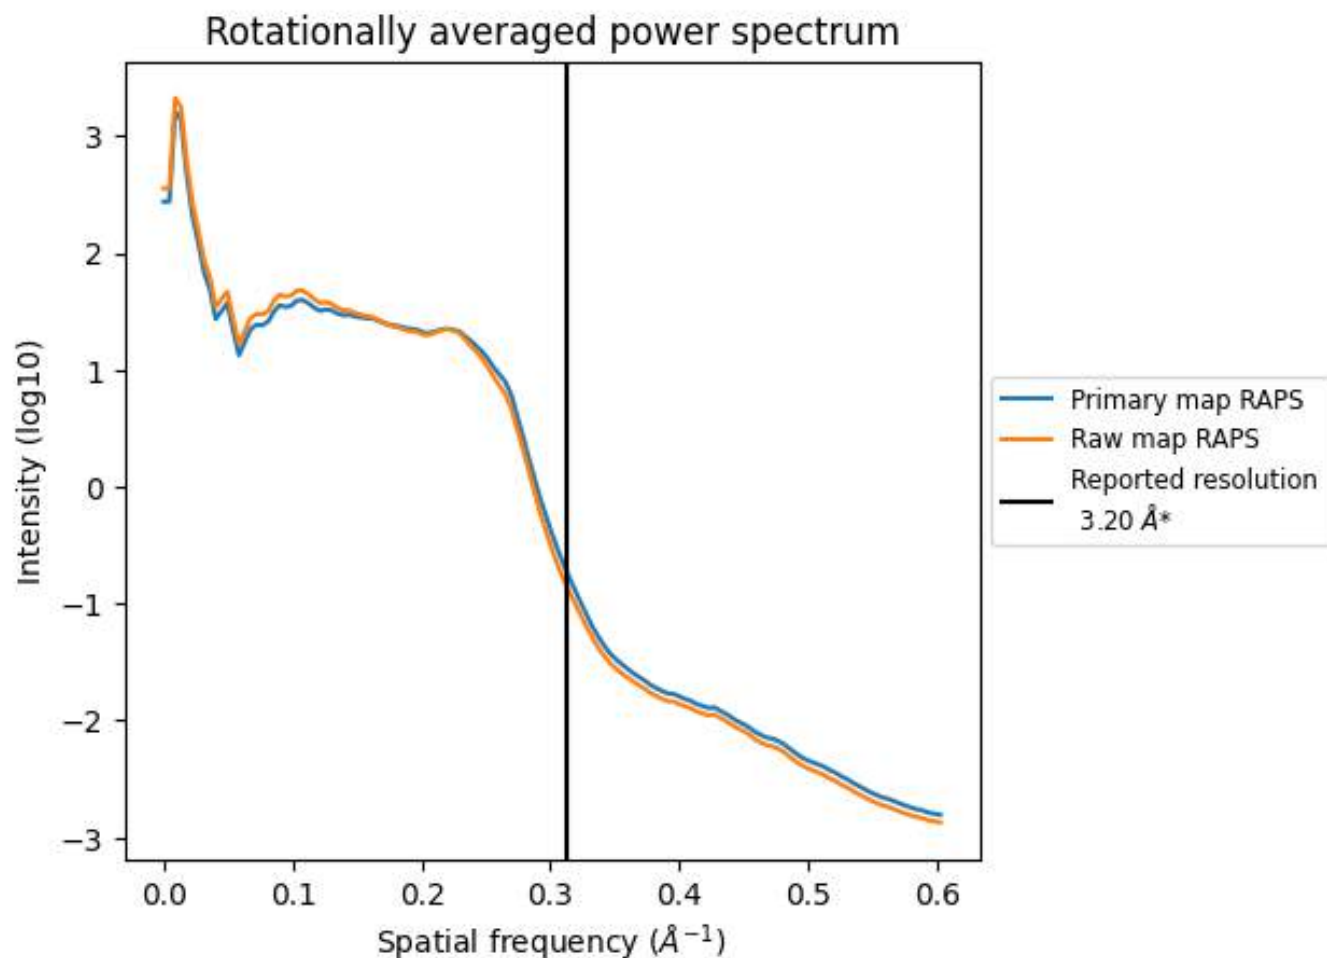

\*Reported resolution corresponds to spatial frequency of 0.312 Å<sup>-1</sup>

## 8 Fourier-Shell correlation [i](#)

Fourier-Shell Correlation (FSC) is the most commonly used method to estimate the resolution of single-particle and subtomogram-averaged maps. The shape of the curve depends on the imposed symmetry, mask and whether or not the two 3D reconstructions used were processed from a common reference. The reported resolution is shown as a black line. A curve is displayed for the half-bit criterion in addition to lines showing the 0.143 gold standard cut-off and 0.5 cut-off.

### 8.1 FSC [i](#)

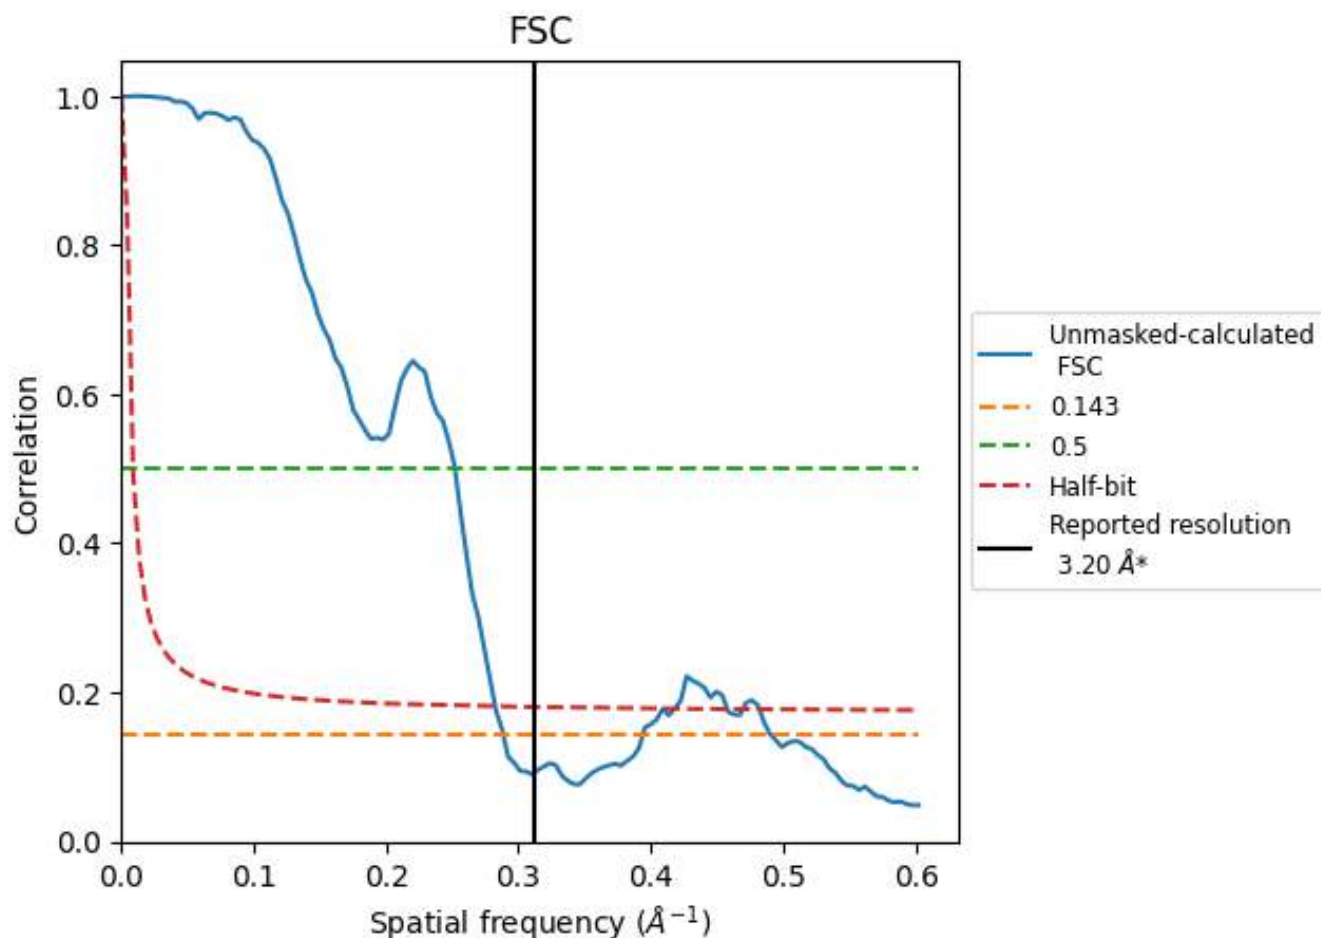

\*Reported resolution corresponds to spatial frequency of 0.312 Å<sup>-1</sup>

## 8.2 Resolution estimates [i](#)

| Resolution estimate (Å)   | Estimation criterion (FSC cut-off) |      |          |
|---------------------------|------------------------------------|------|----------|
|                           | 0.143                              | 0.5  | Half-bit |
| Reported by author        | 3.20                               | -    | -        |
| Author-provided FSC curve | -                                  | -    | -        |
| Unmasked-calculated*      | 3.47                               | 3.97 | 3.54     |

\*Resolution estimate based on FSC curve calculated by comparison of deposited half-maps.

## 9 Map-model fit ⓘ

This section contains information regarding the fit between EMDB map EMD-40678 and PDB model 8SPB. Per-residue inclusion information can be found in section 3 on page 7.

### 9.1 Map-model overlay ⓘ

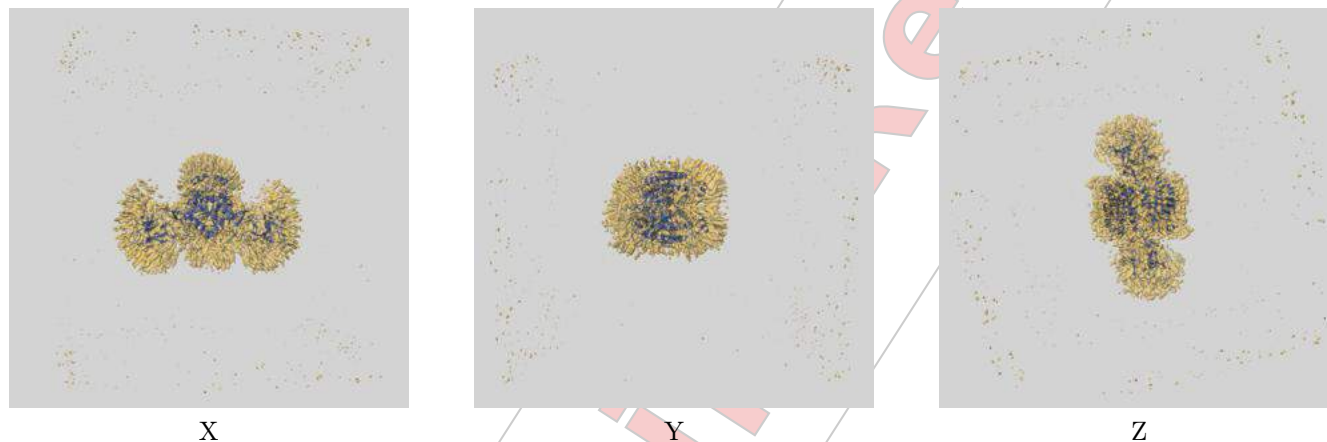

The images above show the 3D surface view of the map at the recommended contour level 0.15 at 50% transparency in yellow overlaid with a ribbon representation of the model coloured in blue. These images allow for the visual assessment of the quality of fit between the atomic model and the map.

## 9.2 Q-score mapped to coordinate model [i](#)

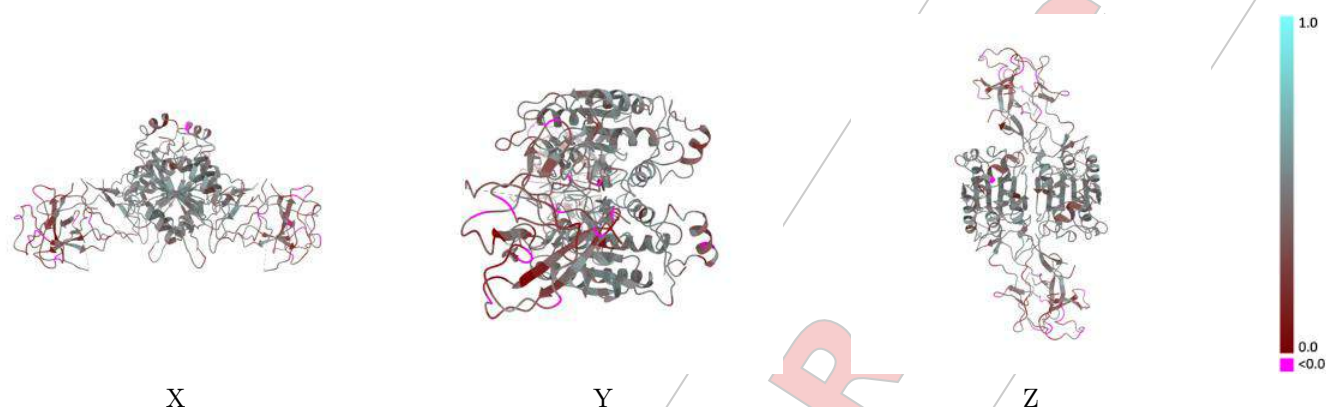

The images above show the model with each residue coloured according to its Q-score. This shows their resolvability in the map with higher Q-score values reflecting better resolvability. Please note: Q-score is calculating the resolvability of atoms, and thus high values are only expected at resolutions at which atoms can be resolved. Low Q-score values may therefore be expected for many entries.

## 9.3 Atom inclusion mapped to coordinate model [i](#)

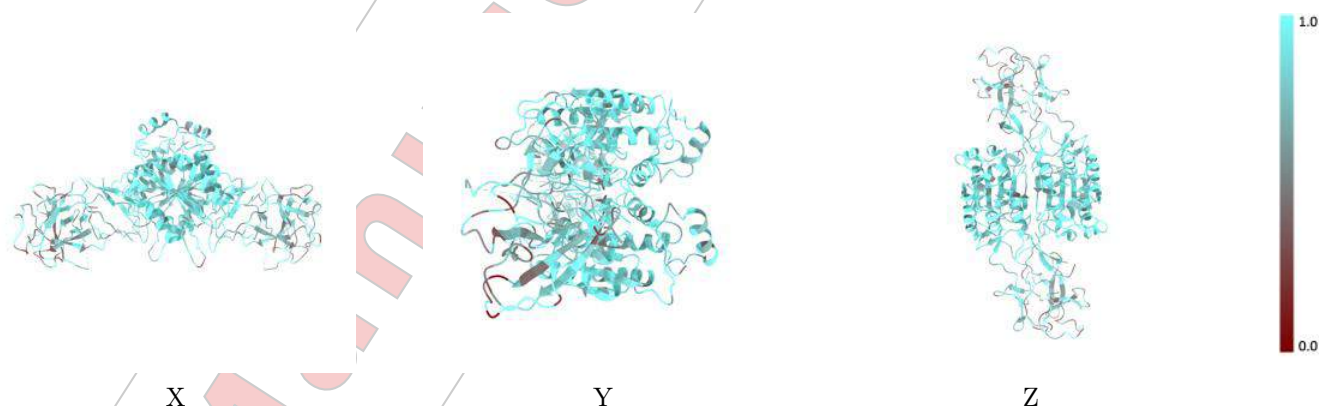

The images above show the model with each residue coloured according to its atom inclusion. This shows to what extent they are inside the map at the recommended contour level (0.15).

## 9.4 Atom inclusion [i](#)

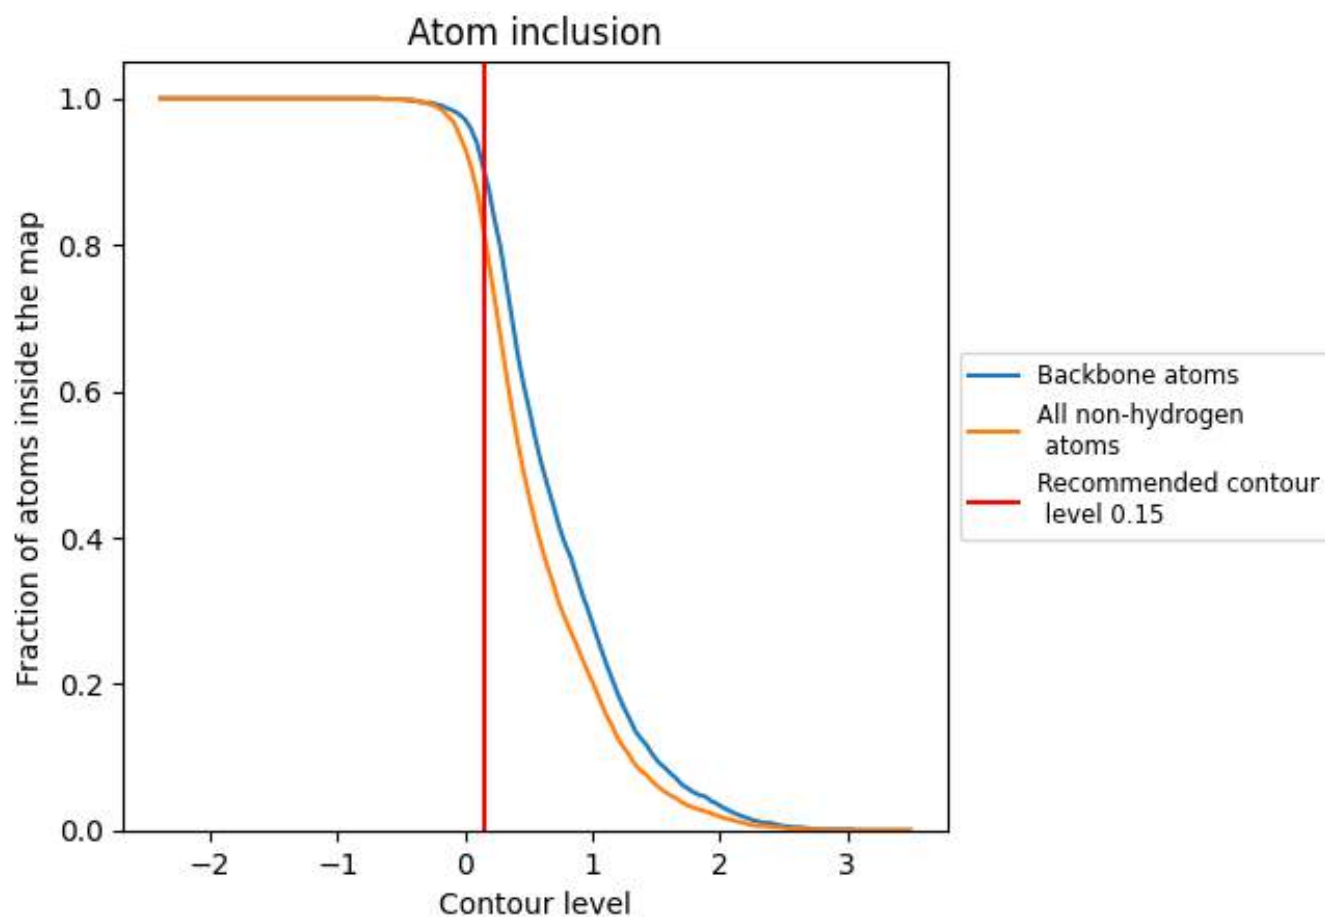

At the recommended contour level, 90% of all backbone atoms, 82% of all non-hydrogen atoms, are inside the map.

## 9.5 Map-model fit summary ⓘ

The table lists the average atom inclusion at the recommended contour level (0.15) and Q-score for the entire model and for each chain.

| Chain | Atom inclusion                                                                           | Q-score                                                                                  |
|-------|------------------------------------------------------------------------------------------|------------------------------------------------------------------------------------------|
| All   | 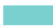 0.8150 | 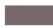 0.4050 |
| A     | 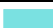 0.8830 | 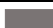 0.4570 |
| B     | 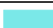 0.9120 | 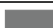 0.4860 |
| C     | 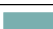 0.6900 | 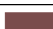 0.3000 |
| a     | 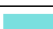 0.8750 | 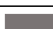 0.4560 |
| b     | 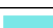 0.9090 | 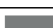 0.4940 |
| c     | 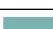 0.6960 | 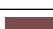 0.3020 |

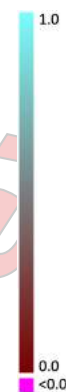

Supplement: NIHMS1956675-supplement-1.pdf [file NIHMS1956675-supplement-1.pdf]
